1 **CCL28 modulates neutrophil responses and impacts the trajectory of mucosal infections.**

2 Araceli Perez-Lopez<sup>1,2,3</sup>, Steven Silva<sup>1</sup>, Nicholas Dillon<sup>1</sup>, Stephanie L. Brandt<sup>1</sup>, Romana R.  
3 Gerner<sup>1</sup>, Michael H. Lee<sup>1</sup>, Karine Melchior<sup>1</sup>, Jiram Torres-Ruiz<sup>4,5</sup>, Victor A. Sosa-Hernandez<sup>6,7</sup>,  
4 Rodrigo Cervantes-Diaz<sup>6,7</sup>, Alfredo Perez-Fragoso<sup>4</sup>, Sandra Romero-Ramirez<sup>6,8</sup>, Diana Gomez-  
5 Martin<sup>4</sup>, Jose L. Maravillas-Montero<sup>6</sup>, Sean-Paul Nuccio<sup>1,2</sup>, Victor Nizet<sup>1,9,10</sup>, and Manuela  
6 Raffatellu<sup>1,2,10,11\*</sup>

7 <sup>1</sup> Division of Host-Microbe Systems & Therapeutics, Department of Pediatrics, University of  
8 California San Diego, La Jolla, CA 92093, USA

9 <sup>2</sup> Department of Microbiology and Molecular Genetics, University of California Irvine, Irvine, CA  
10 92697, USA

11 <sup>3</sup> Biomedicine Research Unit, Facultad de Estudios Superiores Iztacala, Universidad Nacional  
12 Autónoma de México. Tlalneantla, State of México 54090, México.

13 <sup>4</sup> Department of Immunology and Rheumatology, Instituto Nacional de Ciencias Médicas y  
14 Nutrición Salvador Zubirán. México City 14080, México

15  
16 <sup>5</sup> Emergency Medicine Department, Instituto Nacional de Ciencias Médicas y Nutrición Salvador  
17 Zubirán. Mexico City 14080, México

18  
19 <sup>6</sup> Red de Apoyo a la Investigación, Universidad Nacional Autónoma de México and Instituto  
20 Nacional de Ciencias Médicas y Nutrición Salvador Zubirán, Mexico City 14080, México

21  
22 <sup>7</sup> Departamento de Biomedicina Molecular, Centro de Investigación y de Estudios Avanzados del  
23 Instituto Politécnico Nacional, Mexico City 07360, Mexico

24  
25 <sup>8</sup> Facultad de Medicina, Universidad Nacional Autónoma de México, Mexico City 04510, Mexico

26  
27 <sup>9</sup> Skaggs School of Pharmacy and Pharmaceutical Sciences, University of California San Diego,  
28 La Jolla, CA, 92093, USA

29 <sup>10</sup> Center for Microbiome Innovation, University of California San Diego, La Jolla, CA 92093, USA

30 <sup>11</sup> Chiba University-UC San Diego Center for Mucosal Immunology, Allergy, and Vaccines (CU-  
31 UCSD cMAV), La Jolla, CA 92093, USA

32  
33  
34 \*To whom correspondence should be addressed:  
35 Manuela Raffatellu - Email: [manuelar@ucsd.edu](mailto:manuelar@ucsd.edu)

36

## 37 **Summary**

38 The mucosal chemokine CCL28 is highly upregulated during infection but its role in this context  
39 is not well understood. Utilizing *Ccl28*<sup>-/-</sup> mice, we discovered that CCL28 promotes neutrophil  
40 recruitment to the infected mucosa. Neutrophils from these tissues expressed the CCL28 receptor  
41 CCR3, and CCR3 stimulation enhanced neutrophil antimicrobial activity against *Salmonella*.  
42 Moreover, bone marrow neutrophils harbored pre-formed intracellular CCR3 that was rapidly  
43 mobilized to the cell surface following phagocytosis or inflammatory stimuli. The functional  
44 consequences of CCL28 deficiency were strikingly different between two infection models, as  
45 *Ccl28*<sup>-/-</sup> mice were highly susceptible to *Salmonella* gut infection, but highly resistant to otherwise  
46 lethal *Acinetobacter* lung infection. CCL28 thus plays a critical role in the immune response to  
47 mucosal pathogens by regulating neutrophil recruitment and activation, a response whose  
48 ultimate consequence ranges from beneficial (control of the pathogen) to exceedingly negative  
49 (death of the host), depending on the infectious agent and impacted organs.

50

## 51 **Introduction**

52 Chemokines comprise a family of small chemoattractant proteins that play important roles  
53 in diverse host processes including chemotaxis, immune cell development, leukocyte activation  
54 and effector functions, tumor growth, and metastasis (Charo and Ransohoff, 2006; Zlotnik and  
55 Yoshie, 2000; Zlotnik et al., 2011). The chemokine superfamily includes 48 human ligands and  
56 19 receptors, commonly classified into subfamilies (CC, CXC, C, and CX<sub>3</sub>C) depending on the  
57 location of the cysteines in their sequence (Hughes and Nibbs, 2018; Nomiya et al., 2013).  
58 Four chemokines predominate in mucosal tissues: CCL25, CCL28, CXCL14, and CXCL17  
59 (Hernández-Ruiz and Zlotnik, 2017).

60 CCL28, also known as Mucosae-associated Epithelial Chemokine (MEC), belongs to the  
61 CC (or  $\beta$ -chemokine) subclass, and is constitutively produced in mucosal tissues including the  
62 digestive system, respiratory tract, and female reproductive system (Mohan et al., 2017). Although  
63 best studied for its homeostatic functions, CCL28 can also be induced under inflammatory  
64 conditions and is thus considered a dual function (homeostatic and inflammatory) chemokine  
65 (Mohan et al., 2017).

66 CCL28 signals via two receptors: CCR3 and CCR10 (Pan et al., 2000). During  
67 homeostasis in mice, CCL28 provides a chemotactic gradient for CCR10<sup>+</sup> B and T cells and  
68 guides the migration of CCR10<sup>+</sup> IgA plasmablasts to the mammary gland and other tissues  
69 (Burkhardt et al., 2019; Matsuo et al., 2018; Mohan et al., 2017). In a disease context, CCL28 has  
70 been best studied in allergic airway inflammation. High CCL28 levels are present in airway  
71 biopsies from asthma patients (O’Gorman et al., 2005), and CCR3<sup>+</sup> and CCR10<sup>+</sup> cells are  
72 recruited to the airways in a CCL28-dependent fashion in murine asthma models (English et al.,  
73 2006; John et al., 2005). Recently, CCL28 was noted to be highly induced in adult patients with  
74 severe disease and organ damage stemming from SARS-CoV-2 infection (COVID-19) and  
75 children with COVID-19-associated multisystem inflammatory syndrome (Gruber et al., 2020; Yan  
76 Yan et al., 2020).

77 In the human gut, CCL28 is upregulated during inflammation of the gastric mucosa in  
78 *Helicobacter pylori*-infected patients (Hansson et al., 2008) and in the colon of patients with  
79 ulcerative colitis, an important form of inflammatory bowel disease (Lee et al., 2020a; Ogawa et  
80 al., 2004). In the mouse gut, CCL28 production is increased in the dextran sulfate sodium (DSS)  
81 model of colitis (Matsuo et al., 2018). Epithelial cells are an important source of CCL28 (Lee et  
82 al., 2020a; Ogawa et al., 2004), and its expression can be induced by stimulation of cultured  
83 airway or intestinal epithelial cells with the proinflammatory cytokines IL-1 $\alpha$ , IL-1 $\beta$ , or TNF $\alpha$ , or  
84 following *Salmonella* infection of cultured HCA-7 colon carcinoma cells (Ogawa et al., 2004).

85 Collectively, a variety of studies have postulated that CCL28 is an important chemokine  
86 for inflammatory diseases ranging from asthma to ulcerative colitis, and during the immune  
87 response to infection with bacterial or viral pathogens. Yet, CCL28 function in health and disease  
88 remains understudied, largely because *Ccl28*<sup>-/-</sup> mice have only recently been described  
89 (Burkhardt et al., 2019; Matsuo et al., 2018). Here, we investigate the function and underlying  
90 mechanism of CCL28 during the mucosal response to infection.

91 By comparing infection in *Ccl28*<sup>-/-</sup> mice and their wild-type littermates, we discovered a key  
92 role for CCL28 in promoting the migration and/or retention of neutrophils to the gut during infection  
93 with *Salmonella enterica* serovar Typhimurium (*S. Typhimurium*), and to the lung during infection  
94 with multidrug-resistant *Acinetobacter baumannii*. Although the host responses modulated by  
95 CCL28 are similar in the gut and in the lung mucosa, we observed striking differences between  
96 the functional consequences of CCL28 deficiency in a gut infection model and a lung infection  
97 model. We conclude that the CCL28/CCR3 axis plays a critical role in the innate immune response  
98 to mucosal pathogens by regulating neutrophil recruitment and activation, a response whose  
99 ultimate outcome ranges from beneficial (control of the pathogen) to exceedingly negative (death  
100 of the host), depending on the infectious agent and impacted organs.

101

## 102 **Results**

### 103 **CCL28-mediated responses limit *Salmonella* gut colonization and systemic dissemination.**

104 CCL28 is constitutively produced by many mucosal tissues and further upregulated during  
105 inflammation (Hansson et al., 2008; Lee et al., 2020a; Ogawa et al., 2004). To study the role of  
106 CCL28 during gastrointestinal infection, we utilized the enteric pathogen *S. Typhimurium* and the  
107 well-established streptomycin-treated C57BL/6 mouse model of colitis (Barthel et al., 2003). At  
108 96h post-infection with *S. Typhimurium* we observed an ~4-fold increase of CCL28 by ELISA



109 analysis of feces from wild-type mice relative to uninfected controls (**Fig. 1A**). In a preliminary  
110 characterization, *Ccl28*<sup>-/-</sup> mice infected with *S. Typhimurium* exhibited increased lethality  
111 compared to their wild-type littermates beginning at 24h post-infection (Burkhardt et al., 2019). As  
112 such, we enumerated *S. Typhimurium* colony-forming units (CFU) in tissues at 72h post-infection,  
113 instead of the frequently studied 96h endpoint. We recovered significantly higher *S. Typhimurium*  
114 CFU from the gastrointestinal tract (cecum content, Peyer's patches), the mesenteric lymph  
115 nodes, and systemic sites (bone marrow and spleen) of *Ccl28*<sup>-/-</sup> mice vs. wild-type littermates  
116 (**Fig. 1B**), demonstrating that the chemokine is an essential component of host defense against  
117 *S. Typhimurium* in this colitis model. When bypassing the gut by infecting mice with *S.*  
118 *Typhimurium* via the intraperitoneal route, we also observed an ~4-fold increase of CCL28 in the  
119 serum (**Suppl. Fig. 1A**); however, we recovered equal numbers of *S. Typhimurium* CFU in the  
120 spleen, liver, and blood of wild-type and *Ccl28*<sup>-/-</sup> mice (**Suppl. Fig. 1B**). Taken together, these  
121 results indicate that CCL28 helps the host to control *S. Typhimurium* infection at its point of origin  
122 in the gut mucosa, prompting us to further investigate the underlying mechanisms of CCL28-  
123 mediated mucosal protection.

124

### 125 **CCL28 promotes neutrophil recruitment/retention to the gut during *Salmonella* infection.**

126 During homeostasis, CCL28 has chemotactic activity in the gut mucosa towards CD4<sup>+</sup> and  
127 CD8<sup>+</sup> T cells and IgA-producing B cells (Burkhardt et al., 2019; Matsuo et al., 2018; Mohan et al.,  
128 2017). However, we found that B and T cell numbers in the intestine of wild-type and *Ccl28*<sup>-/-</sup> mice  
129 were similar during homeostasis (**Suppl. Fig. 2A and 2C**) and 48h after *S. Typhimurium* infection  
130 (**Suppl. Fig. 2B and 2D**), indicating that the chemokine's protective role is likely independent of  
131 its B or T cell chemotactic activity. A second role attributed to CCL28 is a direct antimicrobial  
132 activity against some bacteria (e.g., *Streptococcus mutans* and *Pseudomonas aeruginosa*) and  
133 fungi (e.g., *Candida albicans*) (Hieshima et al., 2003). However, we found that *S. Typhimurium* is  
134 not susceptible to CCL28's antimicrobial activity *in vitro* (**Suppl. Fig. 1C, D**).

135 Neutrophils are a crucial component of the host response to *S. Typhimurium* (reviewed in  
136 (Perez-Lopez et al., 2016)), and neutropenia increases the severity of infection with non-typhoidal  
137 *Salmonella* in both mice and humans (Bhatti et al., 1998; Fierer, 2001; Vassiloyanakopoulos et  
138 al., 1998; Yaman et al., 2018). Strikingly, we found that ~50% fewer neutrophils (CD11b<sup>+</sup> Ly6G<sup>+</sup>  
139 cells) were recruited to the gut of *Ccl28*<sup>-/-</sup> mice 48h after *S. Typhimurium* infection relative to their  
140 wild-type littermates (**Fig. 1C, D**). Commensurate with this finding, neutrophil counts in the blood  
141 of infected *Ccl28*<sup>-/-</sup> mice were increased compared to wild-type mice (**Fig. 1C, D**), indicating a  
142 defect in recruitment of circulating neutrophils to the site of infection. Neutrophil counts in the bone  
143 marrow were similar between wild-type and *Ccl28*<sup>-/-</sup> animals (**Fig. 1C, D**), excluding a defect in  
144 granulopoiesis. Likewise, bone marrow and blood neutrophil counts were similar in wild-type and  
145 *Ccl28*<sup>-/-</sup> mice under homeostatic conditions (**Suppl. Fig. 2E, F**) and neutrophils were not found in  
146 uninfected gut tissue (data not shown). Thus, CCL28 promotes recruitment and/or retention of  
147 neutrophils to the gut during *S. Typhimurium* infection by a mechanism that transpires after bone  
148 marrow neutrophil production and their egress into the blood circulation.

149

#### 150 **Gut proinflammatory gene expression and tissue pathology are reduced in *Ccl28*<sup>-/-</sup> mice.**

151 Neutrophils can mediate inflammation by directly producing proinflammatory molecules or  
152 by engaging in crosstalk with other cells (Sabroe et al., 2005). We evaluated the expression of  
153 genes encoding proinflammatory cytokines in the cecum of *Ccl28*<sup>-/-</sup> mice and their wild-type  
154 littermates 72h after *S. Typhimurium* infection. IFN $\gamma$  and IL-1 $\beta$  gene transcripts were significantly  
155 higher in the cecum of infected wild-type mice vs. *Ccl28*<sup>-/-</sup> mice, while expression of genes  
156 encoding other factors involved in neutrophil recruitment (CXCL1, GM-CSF, IL-17A) or the  
157 proinflammatory cytokine TNF- $\alpha$  did not differ significantly (**Fig. 1E**). No difference in the  
158 expression of these genes was found between uninfected wild-type mice and *Ccl28*<sup>-/-</sup> mice (data  
159 not shown). Consistent with the role of neutrophils as important mediators of inflammation in *S.*

160 Typhimurium colitis, histopathology at 72h post-infection revealed marked cecal inflammation in  
161 wild-type mice that was greatly reduced in *Ccl28*<sup>-/-</sup> mice (**Fig. 1F-H**). Thus, by modulating the  
162 recruitment/retention of neutrophils to the infected gut, CCL28 promotes the development of  
163 inflammatory tissue pathology and colitis during *S. Typhimurium* infection.

164

### 165 **Gut neutrophils express receptors CCR3 and CCR10 during *Salmonella* infection**

166 CCL28 attracts leukocytes that express at least one of its receptors (CCR3, CCR10).  
167 Eosinophils express CCR3, whereas CCR10 is found on T cells, B cells, and IgA-secreting  
168 plasma cells (Mohan et al., 2017). Although early studies concluded that CCR3 was a marker of  
169 eosinophils but absent in neutrophils (Höchstetter et al., 2000), the receptor was later detected  
170 on the surface of neutrophils isolated from patients with chronic inflammation (Hartl et al., 2008).  
171 Based on our findings of CCL28-dependent neutrophil recruitment to the gut during enteric  
172 infection (**Fig. 1**), we performed flow cytometry on single-cell suspensions from the gut, blood,  
173 and bone marrow of mice infected with *S. Typhimurium* to study surface expression of CCR3 and  
174 CCR10. While both chemokine receptors were identified on a subset of bone marrow neutrophils  
175 (36% CCR3, 12% CCR10) and blood neutrophils (25% CCR3, 16% CCR10) during infection,  
176 neutrophils expressing these receptors were enriched in the inflamed gut, with ~80% expressing  
177 CCR3 and ~28% expressing CCR10 (**Fig. 2A, B**). In a separate experiment where neutrophils  
178 were simultaneously stained for both CCR3 and CCR10, ~35% of gut neutrophils from infected  
179 wild-type mice expressed both receptors (**Suppl. Fig. 3A**), and infected *Ccl28*<sup>-/-</sup> mice expressed  
180 similar levels of these receptors as wild-type mice (**Suppl. Fig. 3B**). Thus, neutrophil expression  
181 of a CCL28 receptor, particularly CCR3, appears to facilitate recruitment and/or retention to the  
182 gut during *S. Typhimurium* colitis.

183

184 **Proinflammatory stimuli and phagocytosis induce expression of CCR3 and CCR10 on**  
185 **neutrophils**

186 We next investigated potential mechanisms underpinning the upregulation of CCR3 and  
187 CCR10 in neutrophils. A prior study indicated that a cocktail of proinflammatory cytokines (GM-  
188 CSF, IFN $\gamma$ , TNF $\alpha$ ) boosted CCR3 expression in human peripheral blood mononuclear cells  
189 (PBMCs) from healthy donors (Hartl et al., 2008) expression of these cytokines is highly induced  
190 during *S. Typhimurium* colitis (**Fig. 1E**). We thus stimulated bone marrow neutrophils from wild-  
191 type mice (which express low levels of CCR3 and CCR10) with these cytokines (alone or in  
192 combination), or with lipopolysaccharide (LPS), with the protein kinase C activator phorbol 12-  
193 myristate 13-acetate (PMA), or with the N-formylated, bacterial-derived chemotactic peptide  
194 fMLP. Treatment of neutrophils with the GM-CSF + IFN $\gamma$  + TNF $\alpha$  cytokine combination or with  
195 LPS induced higher CCR3 (~40% positive cells) and CCR10 (~20% positive cells) expression,  
196 whereas PMA and fMLP separately yielded more modest yet significant induction (**Fig. 2C, D** and  
197 **Suppl. Fig. 4A, B**).

198  
199 Phagocytosis of microbes and necrotic debris are critical neutrophil functions at tissue foci  
200 of infection and inflammation (Uribe-Querol and Rosales, 2020), and gene expression changes  
201 are observed in human neutrophils following phagocytosis (Kobayashi et al., 2002). We thus  
202 tested whether CCR3 and CCR10 were induced by phagocytosis, incubating bone marrow  
203 neutrophils with latex beads, with or without the aforementioned cytokine cocktail. Although  
204 phagocytosis of latex beads alone did not significantly induce neutrophil CCR3 receptor  
205 expression (~7% of neutrophils), latex beads augmented cytokine cocktail-induced CCR3  
206 expression (~53% of neutrophils vs. ~30% with cocktail alone; **Fig. 2E**). This synergistic effect of  
207 phagocytosis was not noted for CCR10 (**Fig. 2F**).

208

209 To further probe the role of phagocytosis in CCR3 expression, we incubated bone marrow  
210 neutrophils with live *S. Typhimurium* for 1h. We found that *S. Typhimurium* rapidly induced the  
211 expression of CCR3 on the neutrophil surface (~80% of cells; **Fig. 2G**), whereas CCR10 was only  
212 minimally induced (**Fig. 2H**). To confirm that phagocytosis of bacteria was responsible for inducing  
213 receptor expression, the assay was repeated with cytochalasin D, a potent inhibitor of the actin  
214 polymerization required for phagocytic uptake, or with vehicle alone (DMSO). Whereas ~60% of  
215 bone marrow neutrophils became CCR3<sup>+</sup> within 1h of *S. Typhimurium* infection, this induction  
216 was largely blocked by cytochalasin D (**Fig. 2I**); and while CCR10 was expressed in ~4% of  
217 neutrophils following infection, cytochalasin D exhibited a similar inhibitory effect on its expression  
218 (**Fig. 2J**). Proinflammatory stimuli and phagocytosis thus enhance the expression of CCR3 and,  
219 to a lesser extent, CCR10, on the neutrophil surface.

220

### 221 **CCR3 is stored intracellularly in neutrophils**

222 Neutrophil intracellular compartments and granules harbor enzymes, cytokines, and  
223 receptors that are required for rapid responses to pathogens. For example, activation of human  
224 neutrophils induces a rapid translocation of complement receptor type 1 (CR1) from an  
225 intracellular compartment to the cell surface, increasing its surface expression up to 10-fold  
226 (Berger et al., 1991).

227 As we detected a rapid (within 1h) increase of neutrophil CCR3 surface expression upon  
228 *S. Typhimurium* infection, we hypothesized that CCR3, akin to CR1, may be stored in a neutrophil  
229 intracellular compartment, consistent with reports of intracellular CCR3 in eosinophils (Spencer  
230 et al., 2006). We found that uninfected bone marrow neutrophils express relatively low surface  
231 levels of CCR3 (**Fig. 3A**), but when permeabilized for intracellular staining, most (~85%) were  
232 CCR3<sup>+</sup>, indicating that CCR3 is stored intracellularly (**Fig. 3B**). Upon *S. Typhimurium* infection *in*  
233 *vitro*, bone marrow neutrophils rapidly increased CCR3 surface expression (**Fig. 3A**), consistent

234 with a mobilization of pre-formed receptor from an intracellular compartment (**Fig. 3B**).  
235 Intracellular stores of CCR10 were not detected in bone marrow neutrophils under homeostatic  
236 conditions nor during *S. Typhimurium* infection (**Suppl. Fig. 4C**). Neutrophils from bone marrow,  
237 blood, and gut tissue of mice orally infected with *S. Typhimurium* harbored both intracellular and  
238 surface CCR3, albeit at differing levels (**Fig. 3C**). We conclude that CCR3 is present intracellularly  
239 in neutrophils and quickly mobilized to the cell surface upon infection, phagocytosis, and/or  
240 cytokine stimulation.

241

## 242 **Contributions of CCL28 to neutrophil chemotaxis and antimicrobial activity**

243 Chemokines are essential for neutrophil migration to sites of infection and may regulate  
244 additional neutrophil bactericidal effector functions including the production of reactive oxygen  
245 species (ROS), release of antimicrobial peptides, and formation of neutrophil extracellular traps  
246 (NETs) (Capucetti et al., 2020). We tested if CCL28 has chemotactic and/or immunostimulatory  
247 activity towards bone marrow neutrophils *in vitro* after boosting their CCR3 surface expression  
248 with the cytokine cocktail (GM-CSF + IFN $\gamma$  + TNF $\alpha$ ) shown in **Fig. 2**. We incubated the neutrophils  
249 either with CCL28, or with the well-known neutrophil chemoattractant CXCL1, or with  
250 CCL11/eotaxin (a chemokine that binds CCR3 and is induced in the asthmatic lung to promote  
251 eosinophil recruitment (Conroy and Williams, 2001; Garcia-Zepeda et al., 1996; Kitaura et al.,  
252 1996)). We found CCL28 promoted neutrophil chemotaxis, though not as potently as CXCL1,  
253 while CCL11 had no significant effect (**Fig. 3D**).

254 To test whether CCL28 stimulation enhanced neutrophil effector function, we incubated  
255 *S. Typhimurium* with bone marrow neutrophils for 2.5h with or without CCL28 or CCL11, then  
256 quantified bacterial killing. Stimulation with CCL28 strongly increased neutrophil bactericidal  
257 activity against *S. Typhimurium*, with clearance of ~40% of the bacterial inoculum, compared to

258 only ~10% clearance seen with unstimulated neutrophils (**Fig. 3E**). Neutrophils stimulated with  
259 CCL11 displayed an intermediate phenotype (~25% bacterial killing). Corroborating receptor  
260 specificity, the CCL28-mediated increase in neutrophil bactericidal activity was reversed in the  
261 presence of the small molecule SB328437, a CCR3 antagonist (White et al., 2000) (**Fig. 3F**).  
262 Similarly, SB328437 also reversed the effect of CCL11 on neutrophil bactericidal activity (**Fig.**  
263 **3F**). Together, these results demonstrate that CCL28 boosts neutrophil effector function in a  
264 CCR3-dependent manner.

265

### 266 ***Ccl28*<sup>-/-</sup> mice are protected from lethal infection in an *Acinetobacter* pneumonia model**

267 CCL28 is expressed in several mucosal tissues beyond the gut, including the lung (Mohan  
268 et al., 2017). To investigate if CCL28 mediates neutrophil recruitment and host protection during  
269 lung infection, we employed a murine *Acinetobacter baumannii* pneumonia model (Dillon et al.,  
270 2019; Lin et al., 2015). *A. baumannii* is an emerging, frequently multidrug-resistant Gram-negative  
271 pathogen that causes potentially lethal nosocomial pneumonia in intensive care unit patients  
272 (Ayoub Moubareck and Hammoudi Halat, 2020). Following intratracheal *A. baumannii* infection,  
273 we observed a striking and unexpected phenotype in the mortality curves of wild-type vs. *Ccl28*<sup>-/-</sup>  
274 mice: while 6 out of 8 wild-type littermates (75%) died within 48h, 7 out of 8 of the *Ccl28*<sup>-/-</sup> knockout  
275 mice (88%) survived through Day 10 post-infection (**Fig. 4A**). The enhanced resistance of *Ccl28*<sup>-/-</sup>  
276 mice relative to their wild-type littermates was not associated with a significant reduction in *A.*  
277 *baumannii* CFU recovered from bronchoalveolar lavage (BAL) fluid or blood (**Fig. 4B, C**). Thus,  
278 opposite to what we observed during *S. Typhimurium* gut infection, CCL28 did not confer  
279 protection during *A. baumannii* lung infection, but rather exacerbated lethality.

280



281 **CCL28 promotes neutrophil recruitment/retention to the lung during *Acinetobacter***  
282 **infection**

283 Prior studies demonstrated that neutrophils are recruited to the lungs of mice infected with  
284 *A. baumannii* beginning at 4h post-infection, and peak at 24h post-infection (Tsuchiya et al., 2012;  
285 Van Faassen et al., 2007). As CCL28 contributed to neutrophil recruitment during *S. Typhimurium*  
286 gut infection, we analyzed neutrophil recruitment to the lung mucosa 24h after *A. baumannii*  
287 infection in wild-type and *Ccl28*<sup>-/-</sup> mice. BAL fluid showed a significantly greater cellular infiltrate  
288 (largely comprised of neutrophils; CD11b<sup>+</sup> Ly6G<sup>+</sup> cells) in wild-type mice than in *Ccl28*<sup>-/-</sup> littermates  
289 (**Fig. 4D-F**). A similar higher percentage of neutrophils was identified in lung tissue of wild-type  
290 mice compared to *Ccl28*<sup>-/-</sup> mice post-infection, whereas we found no differences in neutrophil  
291 numbers in the blood or bone marrow (**Fig. 4E-F**). Although histopathology of lung tissue revealed  
292 substantial lung inflammation in both wild-type and *Ccl28*<sup>-/-</sup> mice after *A. baumannii* infection  
293 (**Supp. Fig 5**), immunofluorescence analysis revealed remarkable differences in the composition  
294 of the cellular infiltrate — lungs from infected wild-type mice showed an abundant infiltrate of  
295 neutrophils (Ly6G<sup>+</sup> cells) that was significantly reduced in *Ccl28*<sup>-/-</sup> mice (**Fig. 4G-H and Supp. Fig**  
296 **5**).

297  
298 Comparable to what we observed during *S. Typhimurium* gut infection, induction of the  
299 genes encoding IFN $\gamma$  and IL-1 $\beta$  was significantly lower in *A. baumannii*-infected lungs of *Ccl28*<sup>-/-</sup>  
300 mice relative to wild-type mice (**Fig. 4I**). By contrast, expression of the *Cxcl1* gene was reduced,  
301 whereas the other proinflammatory genes tested (*Il17a*, *Csf2*, *Tnfa*) did not differ between the  
302 groups (**Fig. 4I**). CCL28 thus contributes to lung inflammation and neutrophil recruitment/retention  
303 during *A. baumannii* pneumonia.

304

305 **Lung neutrophils express receptors CCR3 and CCR10 during *Acinetobacter* infection**



306 As with neutrophils isolated from the gut of wild-type mice infected with *S. Typhimurium*,  
307 neutrophils isolated from the BAL of *A. baumannii*-infected wild-type mice were positive for CCR3  
308 and CCR10 surface expression, with ~73% of neutrophils expressing CCR3 (**Fig. 5A**) and ~43%  
309 expressing CCR10 (**Fig. 5B**). In a separate experiment where neutrophils were simultaneously  
310 stained for both CCR3 and CCR10, ~20% of BAL neutrophils from infected wild-type mice  
311 expressed both receptors (**Suppl. Fig. 3C**), and infected *Ccl28*<sup>-/-</sup> mice expressed similar levels of  
312 these receptors as wild-type mice (**Suppl. Fig. 3D**). As predicted, a lower percentage of  
313 neutrophils isolated from the blood and the bone marrow of mice infected with *A. baumannii* were  
314 positive for the receptors (**Fig. 5A, 5B**). Moreover, neutrophils isolated from all of these locations  
315 harbored CCR3 intracellularly, and surface expression levels were higher on neutrophils isolated  
316 from the BAL relative to other sites (**Fig. 5C**).

317 *In vitro* infection with *A. baumannii* rapidly induced surface expression of CCR3 on  
318 neutrophils (**Fig. 5D**), although the induction was smaller than that observed with *S. Typhimurium*  
319 (**Fig. 2G**). In contrast to findings with *S. Typhimurium*, *ex vivo* neutrophil killing of *A. baumannii*  
320 was not significantly enhanced by CCL28 or CCL11 treatment (**Fig. 5E**). Taken together, our  
321 results indicate that CCL28 modulates host responses in the lung, including the recruitment of  
322 neutrophils, during *A. baumannii* infection. However, CCL28 is not protective in this context, in  
323 part because the CCL28-mediated influx of neutrophils (**Fig. 4D-H** and **Suppl. Fig. 5**) fails to  
324 reduce pathogen burden (**Fig. 4B,C**).

325

## 326 **CCR3 and CCR10 are highly induced in neutrophils isolated from COVID-19 patients**

327 We next sought to determine whether our findings in the mouse model could be evidenced  
328 in humans. At this point in our study (mid-2020), infection with SARS-CoV-2 had become a global  
329 pandemic, and predominated among patients hospitalized with an infection. A subset of COVID-

330 19 patients progress to severe disease with pneumonia and organ damage. Such patients  
331 typically exhibit a marked increase of neutrophils, accompanied in the most severe cases by an  
332 increased neutrophil to lymphocyte ratio (Fu et al., 2020). SARS-CoV-2 also induces the formation  
333 of neutrophil extracellular traps (NETs) that further exacerbate inflammatory pathology (Veras et  
334 al., 2020). These characteristic findings gave us a window to investigate whether CCR3 and  
335 CCR10 are expressed on the surface of neutrophils in human patients with severe COVID-19  
336 disease including those in critical condition (see recruitment criteria in the materials and methods).

337 Consistent with the aforementioned reports, both severe and critical COVID-19 patients  
338 exhibited a marked increase in the percentage of blood neutrophils relative to healthy controls  
339 (**Supp. Fig. 6A**). Neutrophils from both groups of COVID-19 patients exhibited low surface  
340 expression of L-selectin (CD62L; **Supp. Fig. 6B**), indicating that these cells were activated. In  
341 healthy controls, only a small percentage of neutrophils (fewer than ~4%) expressed CCR3 and  
342 CCR10 on their surface (**Supp. Fig. 6C,D**). In contrast, patients with severe COVID-19 showed  
343 a significant upregulation of surface CCR3 and, to a lesser extent, CCR10 (**Supp. Fig. 6C,D**).  
344 Analysis of clinical parameters for COVID-19 patients revealed that the percentage of CCR3<sup>+</sup>  
345 neutrophils correlated with many markers of disease severity, including higher respiratory  
346 frequency, elevated prothrombin time, and D dimer (**Supp. Fig. 6E, F**). Thus, neutrophils isolated  
347 from COVID-19 patients express CCR3 and CCR10 on their surface, indicating that these  
348 receptors are indeed present on neutrophils during human disease.

349

## 350 Discussion

351 The mucosal immune response serves to maintain tissue homeostasis and to protect the  
352 host against invading pathogens. Here we discovered that the chemokine CCL28 recruits

353 neutrophils to the mucosa, a response that was protective during gastrointestinal infection with  
354 *Salmonella*, but detrimental during lung infection with *Acinetobacter*.

355 Consistent with our initial observation that *Ccl28*<sup>-/-</sup> mice exhibit higher lethality during *S.*  
356 Typhimurium infection (Burkhardt et al., 2019), we found higher intestinal colonization and  
357 dissemination of *S. Typhimurium* in *Ccl28*<sup>-/-</sup> mice than their wild-type littermates. This beneficial  
358 role for CCL28 was negligible when the pathogen was inoculated intraperitoneally to bypass the  
359 gut mucosa. Although it has been reported that CCL28 exerts direct antimicrobial activity against  
360 some bacteria and fungi (Hieshima et al., 2003), the chemokine does not directly inhibit  
361 *Salmonella in vitro*. Moreover, even though the CCL28 receptors CCR3 and CCR10 are  
362 expressed on eosinophils and on B and T cells (Höchstetter et al., 2000; Pan et al., 2000; Wang  
363 et al., 2000), none of these cell types appeared to be responsible for the observed protective role  
364 of CCL28 during *Salmonella* infection. Eosinophils are not a major component of the host  
365 response to *Salmonella*, and we observed comparable numbers of B and T cells in the gut during  
366 homeostasis, as well as during *Salmonella* infection, in wild-type and *Ccl28*<sup>-/-</sup> mice.

367 Neutrophils are a hallmark of inflammatory diarrhea. In the *Salmonella* colitis model,  
368 neutrophils are rapidly recruited to the gut following infection. We found that neutrophil numbers  
369 were significantly reduced in the mucosa of infected *Ccl28*<sup>-/-</sup> mice relative to wild-type mice,  
370 thereby identifying CCL28 as a key factor for neutrophil recruitment/retention during infection.  
371 Neutrophils migrate from the bone marrow to the blood to infected sites following a chemokine  
372 gradient (Capucetti et al., 2020), and express chemokine receptors CXCR1, CXCR2, CXCR4 and  
373 CCR2, as well as CCR1 and CCR6 under certain circumstances (Kobayashi, 2008). CXCR2 is a  
374 promiscuous receptor that binds to the chemokines CXCL1, 2, 3, 5, 6, 7, and 8 (Ahuja and  
375 Murphy, 1996), whereas CXCR1 only binds CXCL6 and CXCL8 (Capucetti et al., 2020).  
376 Activation of CXCR2 induces mobilization of neutrophils from the bone marrow to the bloodstream  
377 and participates in the release of NETs (Marcos et al., 2010). Engagement of CXCR1 and CXCR2

378 also triggers signaling pathways resulting in the production of cytokines and chemokines that  
379 amplify neutrophil responses (Sabroe et al., 2005). Following extravasation to the site of infection,  
380 neutrophils downregulate CXCR2 and upregulate CCR1, 2, and 5, which cumulatively boosts  
381 neutrophil ROS production and phagocytic activity (Capucetti et al., 2020). Our results indicate  
382 that CCL28 contributes to neutrophil migration and activation, and that its receptors CCR3 and  
383 CCR10 are upregulated in the mucosa during infection, where ~80% of neutrophils express  
384 surface CCR3.

385         Although an initial study concluded CCR3 was absent on neutrophils (Höchstetter et al.,  
386 2000), two subsequent studies reported CCR3 expression on human neutrophils isolated from  
387 the lung of patients with chronic lung disease (Hartl et al., 2008) and on neutrophils isolated from  
388 the BAL of mice infected with influenza (Rudd et al., 2019). CCR10 expression in neutrophils has  
389 not been previously reported. Our study demonstrates that a substantial number of neutrophils  
390 isolated from infected mucosal sites express CCR3 as well as CCR10 on their surface, whereas  
391 in healthy humans and mice the vast majority of neutrophils do not express these receptors on  
392 their surface. As we detected CCR3 on the neutrophil surface quite rapidly after infection, we  
393 predicted that the receptor was stored in intracellular compartments, akin to what was found in  
394 eosinophils (Spencer et al., 2006). Indeed, neutrophils isolated from bone marrow, blood, and  
395 infected mucosal tissue were all positive for CCR3 intracellular staining, and we could recapitulate  
396 the increase of surface receptor expression *in vitro* by incubating bone marrow neutrophils with  
397 proinflammatory stimuli (LPS, or the cytokines GM-CSF + IFN $\gamma$  + TNF $\alpha$ ), or following  
398 phagocytosis of bacterial pathogens. In all cases, upregulation of surface CCR3 on neutrophils  
399 was more robust than that of CCR10. CCL28 stimulation of bone marrow neutrophils *in vitro*  
400 increased their antimicrobial activity against *Salmonella*, which was reverted by the addition of a  
401 CCR3 antagonist. These results were consistent with the *in vivo* data showing reduced  
402 *Salmonella* colonization in wild-type mice.

403           The lung, possessing a thin, single-cell alveolar layer to promote gas exchange, may be  
404 less resilient than the intestine to neutrophil inflammation before losing barrier integrity and critical  
405 functions. Thus, insufficient neutrophil recruitment can lead to life-threatening infection, whereas  
406 extreme accumulation of neutrophils can result in excessive inflammatory lung injury (Craig et al.,  
407 2009). In the *Acinetobacter* pneumonia model, *Ccl28*<sup>-/-</sup> mice exhibit a marked reduction in the  
408 number of neutrophils in the BAL and in the lung. However, in stark contrast to *Salmonella*  
409 infection, *Ccl28*<sup>-/-</sup> mice were protected during *A. baumannii* pneumonia. Most *Ccl28*<sup>-/-</sup> mice  
410 survived until the experiment's arbitrary endpoint at Day 10 post-infection, whereas nearly all wild-  
411 type littermates succumbed by Day 2. In contrast to *Salmonella*, stimulation with CCL28 did not  
412 enhance neutrophil antimicrobial activity against *Acinetobacter*. Moreover, the high survival of  
413 *Ccl28*<sup>-/-</sup> mice infected with *A. baumannii* indicates that CCL28 can play a detrimental role for the  
414 host during pulmonary infection. While functioning neutrophils have been described to play a role  
415 in controlling *Acinetobacter* infection (García-Patiño et al., 2017; Grguric-Smith et al., 2015; Van  
416 Faassen et al., 2007), an exaggeration of neutrophil recruitment to the *Acinetobacter*-infected  
417 lung is deleterious (Yamada et al., 2013; Zeng et al., 2019, 2020). For example, in one relevant  
418 *Acinetobacter* pneumonia study, depletion of alveolar macrophages increased neutrophil  
419 infiltration, promoted extensive tissue damage, and increased systemic dissemination of  
420 *Acinetobacter* (Lee et al., 2020b).

421           Our findings highlight the fact that the impact of the host response to infection can be  
422 context dependent, and that some immune components mediate different outcomes in the gut  
423 and in the lung. For example, neutrophil recruitment to the gut via CXCR2 has a protective effect  
424 during *Salmonella* infection (Marchelletta et al., 2015). In contrast, *Cxcr2*<sup>-/-</sup> mice are protected  
425 during lung infection with *Mycobacterium tuberculosis*, due to reduced neutrophil recruitment and  
426 reduced pulmonary inflammation (Nouailles et al., 2014). Thus, CCL28-dependent modulation of  
427 neutrophil recruitment/retention during infection, and activation of CCR3 and/or CCR10, are

428 protective or detrimental depending on the pathogen and on the site of infection. Consistent with  
429 this notion, an increase in circulating neutrophils is associated with severe disease in COVID-19  
430 patients, where neutrophils contribute to lung and tissue damage (Veras et al., 2020). In our  
431 patient cohort, CCR3 and CCR10 surface expression on blood neutrophils was increased relative  
432 to healthy controls, which correlated with disease severity. Although we did not have access to  
433 BAL or lung tissue, it is possible that CCR3 and CCR10 expression may even be higher in  
434 neutrophils at these sites, similar to our observations in animal models of infection.

435 Altogether, this study demonstrates that CCL28 plays an important role in the mucosal  
436 response to pathogens through the recruitment of neutrophils to the site of infection and through  
437 the activation of CCR3. These findings could have implications for other infectious and non-  
438 infectious diseases where neutrophil recruitment plays a major role, and may lead to the  
439 identification of new CCL28-targeted therapies to modulate neutrophil function and mitigate  
440 collateral damage.

441

## 442 **Materials and methods**

### 443 **Generation and breeding of *Ccl28*<sup>-/-</sup> mice**

444 The first colony of *Ccl28*<sup>-/-</sup> mice was described in a prior manuscript (Burkhardt et al., 2019) and  
445 used for initial studies at UC Irvine. At UC San Diego, we generated a new colony of *Ccl28*<sup>-/-</sup> mice  
446 with Cyagen Biosciences (Santa Clara, California), using CRISPR/CAS9 technology. Exons 1  
447 and 3 were selected as target sites, and two pairs of gRNA targeting vectors were constructed  
448 and confirmed by sequencing. The gRNA and Cas9 mRNA were generated by *in vitro*  
449 transcription, then co-injected into fertilized eggs for knockout mouse production. The resulting  
450 pups (F0 founders) were genotyped by PCR and confirmed by sequencing. F0 founders were

451 bred to wild-type mice to test germline transmission and for F1 animal generation. Tail genotyping  
452 of offspring was performed using the following primers:

453 F: 5'-TCATATACAGCACCTCACTCTTGCCC-3', R: 5'-GCCTCTCAAAGTCATGCCAGAGTC-3'  
454 and He/Wt-R: 5'-TCCCGGCCTTGAGTATGTTAGGC-3'. The expected product size for the wild-  
455 type allele is 466 bp and for the knockout allele is 700 bp.

456 All mouse experiments were conducted with cohoused wild-type and *Ccl28*<sup>-/-</sup> littermate mice, and  
457 were reviewed and approved by the Institutional Animal Care and Use Committees at UC Irvine  
458 and UC San Diego.

459

#### 460 ***Salmonella* infection models**

461 For the *Salmonella* colitis model, 8-10 week-old male and female mice were orally gavaged with  
462 20mg streptomycin 24h prior to oral gavage with 10<sup>9</sup> colony-forming units (CFU) of *Salmonella*  
463 *enterica* serovar Typhimurium strain IR715 (a fully virulent, nalidixic acid-resistant derivative of  
464 ATCC 14028s) (Stojiljkovic et al., 1995), as previously described (Barthel et al., 2003; Raffatellu  
465 et al., 2009). Mice were euthanized at 72h post-infection, then colon content, spleen, mesenteric  
466 lymph nodes, Peyer's patches, and bone marrow were collected, weighed, homogenized, serially  
467 diluted, and plated on Miller Lysogeny broth (LB) + Nal (50µg/mL) agar plates to enumerate  
468 *Salmonella* CFU. For the *Salmonella* bacteremia model, mice were injected intraperitoneally with  
469 10<sup>3</sup> CFU. Mice were euthanized at 72h post-infection, then blood, spleen, and liver were collected  
470 to determine bacterial counts.

471

#### 472 ***Acinetobacter* infection model**

473 For the murine pneumonia model, *Acinetobacter baumannii* strain AB5075 was cultured in Cation-  
474 Adjusted Mueller-Hinton Broth (CA-MHB) overnight, then subcultured the next day to an OD<sub>600</sub> of  
475 ~0.4 (1x10<sup>8</sup> CFU/mL; mid-logarithmic phase). These cultures were centrifuged at 3202xg, the  
476 supernatant was removed, and pellets were resuspended and washed in an equal volume of 1x  
477 Dulbecco's PBS (DPBS) three times. The final pellet was resuspended in 1x DPBS to yield a  
478 suspension of 2.5 x 10<sup>9</sup> CFU/mL. Using an operating otoscope (Welch Allyn), mice under 100  
479 mg/kg ketamine (Koetis) + 10 mg/kg xylazine (VetOne) anesthesia were inoculated intratracheally  
480 with 40 µL of the bacterial suspension (10<sup>8</sup> CFU/mouse). Post-infection mice were recovered on  
481 a sloped heating pad. For analysis of bacterial CFU, mice were sacrificed at 24h post-infection,  
482 the BAL was collected, and serial dilutions were plated on LB agar to enumerate bacteria (Dillon  
483 et al., 2019).

484

#### 485 **Blood samples from COVID-19 patients and healthy donors**

486 Whole-blood samples were collected from COVID-19 patients and healthy donors that were  
487 recruited at a tertiary care center in Mexico City (Instituto Nacional de Ciencias Médicas y  
488 Nutrición Salvador Zubirán). Hospitalized patients with a positive qPCR test for SARS-CoV-2 on  
489 nasopharyngeal swab were invited to participate in the study. Patients were classified as “severe”  
490 or “critical” depending on the following disease severity criteria. Patients with severe illness  
491 displayed one or more of the following signs: respiratory failure, respiratory rate >30 bpm, oxygen  
492 saturation < 92% at rest, arterial partial pressure of oxygen (PaO<sub>2</sub>)/fraction of inspired oxygen  
493 (FiO<sub>2</sub>) (PaO<sub>2</sub>/FiO<sub>2</sub>) ratio < 300 mmHg. Patients with critical illness displayed one or more of the  
494 following signs: requirement for mechanical ventilation, shock, or concomitant organ failure (Liu  
495 et al., 2020). Healthy controls and patients signed an informed consent form before inclusion in  
496 the study, and the protocol was approved by the Instituto Nacional de Ciencias Médicas y  
497 Nutrición Salvador Zubirán ethics and research committees (Ref. 3341) in compliance with the  
498 Helsinki declaration.



499

## 500 **CCL28 ELISA**

501 Fresh fecal samples were collected at 96h post-infection from wild-type mice. Fecal pellets were  
502 weighed, resuspended in 1 mL of sterile PBS containing a protease inhibitor cocktail (Roche),  
503 and incubated at room temperature shaking for 30 min. Samples were centrifuged at 9391xg for  
504 10 min, supernatants were collected, then analyzed to quantify CCL28 using a sandwich ELISA  
505 kit (BioLegend).

506

## 507 **Cell extraction and analysis**

508 For the *Salmonella* colitis model, the terminal ileum, cecum, and colon were collected and kept in  
509 IMDM medium supplemented with 10% FBS and 1% antibiotic/antimycotic. Next, the Peyer's  
510 patches were removed, and the intestinal fragments were cut open longitudinally and washed  
511 with HBSS supplemented with 15 mM HEPES and 1% antibiotic/antimycotic. Then, the tissue  
512 was shaken in 10 mL of an HBSS/ 15 mM HEPES/ 5 mM EDTA/ 10% FBS solution at 37 °C in a  
513 water bath for 15 min. The supernatant was removed and kept on ice. The remaining tissue was  
514 cut into small pieces and digested in a 10 mL mixture of collagenase (Type VII, 1 mg/mL),  
515 Liberase (20 µg/mL), and DNase (0.25 mg/mL) in IMDM medium for 15 min in a shaking water  
516 bath at 37 °C. Afterwards, the supernatant and tissue fractions were strained through a 70 µm  
517 cell strainer and pooled, and the extracted cells were used for flow cytometry staining. For the *A.*  
518 *baumannii* infection model, the lungs were collected and processed as described for the gut. BAL  
519 was collected, centrifuged, and pellets were washed with 1x PBS. The obtained cells were used  
520 for flow cytometry staining. Briefly, cells were blocked with a CD16/32 antibody (Bio-Legend),  
521 stained with the viability dye eFluor780 (Thermo Fisher), then extracellularly stained using the  
522 following monoclonal antibodies: anti-mouse CD45 (clone 30-F11), anti-mouse CD3 (clone  
523 17A2), anti-mouse CD4 (clone RM4-5), anti-mouse CD8α (clone 53-6.7), anti-mouse CD19 (clone

524 1D3/CD19), anti-mouse Ly6G (clone 1A8), anti-mouse CD11b (clone M1/70) from BioLegend;  
525 anti-mouse CCR3 (clone FAB729P) and anti-mouse CCR10 (clone FAB2815A) from R&D  
526 Systems. After staining, cells were fixed for 20 min with 4% paraformaldehyde (Fixation buffer;  
527 BioLegend). When intracellular staining was performed, cells were permeabilized  
528 (Permeabilization buffer; BioLegend), and the staining was performed in the same buffer following  
529 the manufacturer's instructions. Cells were analyzed on an LSRII flow cytometer (BD Biosciences)  
530 and the collected data were analyzed with FlowJo v10 software (TreeStar). For analysis of human  
531 neutrophils, whole-blood samples were collected in ethylenediaminetetraacetic acid (EDTA) for  
532 cellular analyses. Whole blood cell staining was performed using an Fc receptor blocking solution  
533 (Human TruStain FcX; BioLegend), the viability dye eFluor780 (Thermo Fisher), and the following  
534 conjugated monoclonal antibodies: PerCP/Cy5.5 anti-human CD45 antibody (clone HI30), Pacific  
535 Blue anti-mouse/human CD11b antibody (clone M1/70), FITC anti-human CD62L antibody (clone  
536 DREG-56), from BioLegend; PE anti-human CCR3 antibody (clone 61828), and APC anti-human  
537 CCR10 antibody (clone 314305) from R&D Systems. Samples were analyzed by flow cytometry  
538 using an LSR Fortessa flow cytometer (BD Biosciences), and data was analyzed using FlowJo  
539 v10 software.

540

#### 541 ***In vitro* neutrophil stimulation**

542 Neutrophils were obtained from the bone marrow of C57/BL6 wild-type mice using the EasySep  
543 Mouse Enrichment Kit (STEMCELL), following the manufacturer's instructions. After enrichment,  
544  $1 \times 10^6$  neutrophils were seeded in a round-bottom 96-well plate with RPMI media supplemented  
545 with 10% FBS, 1% antibiotic/antimycotic mix, and HEPES (1mM) (Invitrogen). For stimulation,  
546 cells were incubated with the following concentrations of recombinant mouse cytokines: TNF $\alpha$   
547 (100 ng/mL), IFN $\gamma$  (500 U/mL) and GM-CSF (10 ng/mL), all from R&D systems. Recombinant  
548 cytokines were added alone or in combination. For indicated experiments, polystyrene beads

549 (Thermo Fisher) were added to neutrophils at a 1:1 ratio. Cells were incubated for 4 hours at 37  
550 °C and 5% CO<sub>2</sub>. After incubation, cells were recovered by centrifugation, washed with PBS, and  
551 processed for flow cytometry as described above.

552

### 553 **Chemotaxis assay**

554 Enriched neutrophils from the bone marrow of wild-type mice were stimulated with a cocktail of  
555 mouse recombinant cytokines (TNF $\alpha$ , IFN $\gamma$ , GM-CSF), as described above, to induce receptor  
556 expression. After stimulation, cells were washed twice with PBS, resuspended in RPMI media  
557 supplemented with 0.1% BSA (w/v) to a final concentration of 1x10<sup>7</sup> cells/mL, and 100  $\mu$ L of the  
558 cell suspension were placed in the upper compartment of a Transwell chamber (3.0  $\mu$ m pore size;  
559 Corning Costar). 50 nM of recombinant mouse CCL28, CCL11 (R&D Systems), or CXCL1  
560 (Peprotech) were placed into the lower compartment of a Transwell chamber. The Transwell plate  
561 was then incubated for 2h at 37 °C. The number of cells that migrated to the lower compartment  
562 was determined by flow cytometry. The neutrophil chemotaxis index was calculated by dividing  
563 the number of cells that migrated in the presence of a chemokine by the number of cells that  
564 migrated in control chambers without chemokine stimulation.

565

### 566 **Neutrophil *in vitro* infection and bacterial killing assays**

567 Bone marrow neutrophils were obtained from mice as described above. *Salmonella* and *A.*  
568 *baumannii* were grown as described in the respective mouse experiment sections. Bacteria were  
569 then opsonized with 20% normal mouse serum for 30min at 37 °C. After neutrophils were  
570 enriched, 1x10<sup>6</sup> neutrophils were seeded in a round-bottom 96-well plate and bacteria were added  
571 at a multiplicity of infection (MOI)= 10. The plate was centrifuged to ensure interaction between  
572 cells and bacteria. For flow cytometry analysis, cells were incubated for 1h at 37 °C and 5% CO<sub>2</sub>.

573 Then, cells were recovered by centrifugation, washed with PBS, and processed for flow cytometry  
574 as described above. For inhibition of phagocytosis, bone marrow neutrophils were pre-incubated  
575 with cytochalasin D (10  $\mu$ M) in DMSO (0.1%), or DMSO (vehicle), for 30 min prior to infection with  
576 opsonized *S. Typhimurium* for 1h at an MOI=10. For killing assays, recombinant mouse CCL28  
577 (50nM) (Wang et al., 2000) and CCL11 (25nM) (Shamri et al., 2012) (R&D systems) were added  
578 to neutrophils. When indicated, the CCR3 receptor antagonist SB328437 (Tocris Bioscience) was  
579 added at a final concentration of 10  $\mu$ M (White et al., 2000). Neutrophils infected with STm were  
580 incubated for 2.5h and neutrophils infected with *A. baumannii* were incubated for 4.5h at 37 °C  
581 and 5% CO<sub>2</sub>. After incubation, 1:2 dilution was performed with PBS supplemented with 2% Triton  
582 X-100 and then serial dilution was performed and plated on LB agar to enumerate bacteria. To  
583 calculate the percentage of bacterial survival, we divided the number of bacteria recovered in the  
584 presence of neutrophils by the number of bacteria recovered from wells that contained no  
585 neutrophils, then multiplied by 100.

586

### 587 **Growth of *Salmonella* in media supplemented with recombinant chemokines**

588 Cultures of *S. Typhimurium* wild-type were grown overnight at 37°C in LB supplemented with 50  
589  $\mu$ g/mL of nalidixic acid (Nal). The following day, cultures were diluted 1:100 in LB and grown at  
590 37°C for 3 hr, subsequently diluted to  $\sim 0.5 \times 10^6$  CFU/mL in 1 mM potassium phosphate buffer  
591 (pH 7.2), then incubated at 37°C in the presence or absence of recombinant murine CCL28  
592 (BioLegend) at the indicated concentrations. After 2h, samples were plated onto LB + Nal agar to  
593 enumerate viable bacteria. In other assays, *Salmonella* was grown as described above and  
594  $\sim 1 \times 10^7$  CFU/mL were incubated at 37°C for 2.5h in the presence or absence of recombinant  
595 murine CCL28 (50 nM) (Wang et al., 2000) or CCL11 (25 nM) (Shamri et al., 2012) in RPMI  
596 medium supplemented with 10% FBS. After incubation, samples were plated onto LB + Nal agar  
597 to enumerate viable bacteria.

598

### 599 **RNA extraction and qPCR**

600 Total RNA was extracted from mouse cecal or lung tissue using Tri-Reagent (Molecular Research  
601 Center). Reverse transcription of 1 µg of total RNA was performed using the SuperScript VILO  
602 cDNA Synthesis kit (Thermo Fisher Scientific). Quantitative real-time PCR (qRT-PCR) for the  
603 expression of *Actb* (β-actin), *Cxcl1*, *Tnfa*, *Ifng*, *Csf2*, *Il1b*, and *Il17a* was performed using the  
604 PowerUp SYBR Green Master Mix (Applied Biosystems) on a QuantStudio 5 Real-Time PCR  
605 System (Thermo Fisher Scientific). Gene expression was normalized to *Actb* (β-actin). Fold  
606 changes in gene expression were relative to uninfected controls and calculated using the  $\Delta\Delta C_t$   
607 method.

608

### 609 **Histopathology**

610 Cecal and lung tissue samples were fixed in 10% buffered formalin, embedded in paraffin  
611 according to standard procedures, and sectioned at 5 µm. Pathology scores of cecal and lung  
612 samples were determined by blinded examinations of hematoxylin and eosin (H&E)-stained  
613 sections. Each cecal section was evaluated using a semiquantitative score as described  
614 previously (Moschen et al., 2016). Lung inflammation was assessed by a multiparametric scoring  
615 based on previous work (Lammers et al., 2012).

616

### 617 **Immunofluorescence**

618 Deparaffinized lung sections were stained with a purified rat anti-mouse Ly6G antibody (clone  
619 1A8, BioLegend) according to standard immunohistochemical procedures. Ly6G+ cells were  
620 visualized by a goat anti-rat secondary antibody (Invitrogen). Cell nuclei were stained with DAPI

621 in SlowFade Gold Antifade Mountant (Invitrogen). Slides were scanned on a Zeiss Axio Scan.Z1  
622 slide scanner and whole lung scans were evaluated with QuPath analysis software (Bankhead et  
623 al., 2017). Ly6G+ cells per mouse were quantified by averaging the neutrophil numbers of 3  
624 consecutive high-power fields in regions with moderate to severe inflammation.

625

## 626 **Statistical analysis**

627 All statistical analysis was conducted in GraphPad Prism 8. Statistical significance was  
628 determined by using one-way ANOVA (multiple comparisons) or *t* test (single comparisons) for  
629 the *in vitro* experiments, or Mann-Whitney U for the *in vivo* experiments. Differences were  
630 considered statistically significant if the *p* value was <0.05.

631

## 632 **Acknowledgements**

633 This work was supported by the NIH (Public Health Service Grants AI121928) to MR, by a pilot  
634 project award from the NIAID Mucosal Immunology Studies Team (MIST) to APL, and by a grant  
635 from the InnovaUNAM of the National Autonomous University of Mexico (UNAM) and Alianza  
636 UCMX of the University of California, to APL and MR. RRG was partly supported by a fellowship  
637 from the Max Kade Foundation and by a fellowship from the Crohn's and Colitis Foundation. MHL  
638 was partly supported by NIH training grant T32 DK007202. ND was supported by NIH training  
639 grant NIH 5T32HD087978-05 and NIH NIAID grant 1-U01-AI124316. MR and VN are supported  
640 by Public Health Service Grant AI145325. Work in JLM-M lab was supported by CONACyT-  
641 FOSISS grant A3-S-36875 and UNAM-DGAPA-PAPIIT Program grant IN213020. Work in MR lab  
642 is also supported by Public Health Service Grants AI126277, AI145325, and AI154644, by the  
643 Chiba University-UCSD Center for Mucosal Immunology, Allergy, and Vaccines. MR holds an  
644 Investigator in the Pathogenesis of Infectious Disease Award from the Burroughs Wellcome Fund.

645 We would like to thank Dr. Albert Zlotnik for his thoughtful suggestions on the project over the  
646 years.

647

648 **Author contributions**

649 APL and MR conceived the overall study. APL, ND, SLB, RRG, MHL, S-PN, VN, and MR designed  
650 the *in vitro* and *in vivo* experiments and analyzed the data. APL, SS, ND, SLB, RRG, MHL, and  
651 KM performed experiments. APL, JT-R, VAS-H, RC-D, AP-F, SR-R, DG-M, and JLM-M performed  
652 the human neutrophil studies. RRG analyzed the histopathology. APL, S-PN, VN, and MR wrote  
653 the paper. APL, S-PN, VN, and MR provided supervision and funding support.

## 654 **References**

- 655 Ahuja, S.K., and Murphy, P.M. (1996). The CXC Chemokines Growth-regulated Oncogene  
656 (GRO)  $\alpha$ , GRO $\beta$ , GRO $\gamma$ , Neutrophil-activating Peptide-2, and Epithelial Cell-derived Neutrophil-  
657 activating Peptide-78 Are Potent Agonists for the Type B, but Not the Type A, Human  
658 Interleukin-8 Receptor. *Journal of Biological Chemistry* 271, 20545–20550.
- 659 Ayoub Moubareck, C., and Hammoudi Halat, D. (2020). Insights into *Acinetobacter baumannii*:  
660 A Review of Microbiological, Virulence, and Resistance Traits in a Threatening Nosocomial  
661 Pathogen. *Antibiotics (Basel)* 9.
- 662 Bankhead, P., Loughrey, M.B., Fernández, J.A., Dombrowski, Y., McArt, D.G., Dunne, P.D.,  
663 McQuaid, S., Gray, R.T., Murray, L.J., Coleman, H.G., et al. (2017). QuPath: Open source  
664 software for digital pathology image analysis. *Sci. Rep.* 7, 16878.
- 665 Barthel, M., Hapfelmeier, S., Quintanilla-Martínez, L., Kremer, M., Rohde, M., Hogardt, M.,  
666 Pfeffer, K., Rüssmann, H., and Hardt, W.-D. (2003). Pretreatment of mice with streptomycin  
667 provides a *Salmonella enterica* serovar Typhimurium colitis model that allows analysis of both  
668 pathogen and host. *Infect. Immun.* 71, 2839–2858.
- 669 Berger, M., Wetzler, E.M., Welter, E., Turner, J.R., and Tartakoff, A.M. (1991). Intracellular sites  
670 for storage and recycling of C3b receptors in human neutrophils. *Proc. Natl. Acad. Sci. U. S. A.*  
671 88, 3019–3023.
- 672 Bhatti, F.N., Burney, I.A., Moid, M.I., and Siddiqui, T. (1998). Bacterial isolates from neutropenic  
673 febrile pediatric patients and their sensitivity patterns to antibiotics. *J. Pak. Med. Assoc.* 48,  
674 287–290.
- 675 Burkhardt, A.M., Perez-Lopez, A., Ushach, I., Catalan-Dibene, J., Nuccio, S.-P., Chung, L.K.,  
676 Hernandez-Ruiz, M., Carnevale, C., Raffatellu, M., and Zlotnik, A. (2019). CCL28 Is Involved in  
677 Mucosal IgA Responses, Olfaction, and Resistance to Enteric Infections. *J. Interferon Cytokine*  
678 *Res.* 39, 214–223.
- 679 Capucetti, A., Albano, F., and Bonecchi, R. (2020). Multiple Roles for Chemokines in Neutrophil  
680 Biology. *Front. Immunol.* 11, 1259.
- 681 Charo, I.F., and Ransohoff, R.M. (2006). The many roles of chemokines and chemokine  
682 receptors in inflammation. *N. Engl. J. Med.* 354, 610–621.
- 683 Conroy, D.M., and Williams, T.J. (2001). Eotaxin and the attraction of eosinophils to the  
684 asthmatic lung. *Respir. Res.* 2, 150–156.
- 685 Craig, A., Mai, J., Cai, S., and Jeyaseelan, S. (2009). Neutrophil recruitment to the lungs during  
686 bacterial pneumonia. *Infect. Immun.* 77, 568–575.
- 687 Dillon, N., Holland, M., Tsunemoto, H., Hancock, B., Cornax, I., Pogliano, J., Sakoulas, G., and  
688 Nizet, V. (2019). Surprising synergy of dual translation inhibition vs. *Acinetobacter baumannii*  
689 and other multidrug-resistant bacterial pathogens. *EBioMedicine* 46, 193–201.
- 690 English, K., Brady, C., Corcoran, P., Cassidy, J.P., and Mahon, B.P. (2006). Inflammation of the  
691 respiratory tract is associated with CCL28 and CCR10 expression in a murine model of allergic



- 692 asthma. *Immunol. Lett.* *103*, 92–100.
- 693 Fierer, J. (2001). Polymorphonuclear leukocytes and innate immunity to *Salmonella* infections in  
694 mice. *Microbes Infect.* *3*, 1233–1237.
- 695 Fu, J., Kong, J., Wang, W., Wu, M., Yao, L., Wang, Z., Jin, J., Wu, D., and Yu, X. (2020). The  
696 clinical implication of dynamic neutrophil to lymphocyte ratio and D-dimer in COVID-19: A  
697 retrospective study in Suzhou China. *Thromb. Res.* *192*, 3–8.
- 698 García-Patiño, M.G., García-Contreras, R., and Licona-Limón, P. (2017). The Immune  
699 Response against *Acinetobacter baumannii*, an Emerging Pathogen in Nosocomial Infections.  
700 *Frontiers in Immunology* *8*.
- 701 Garcia-Zepeda, E.A., Rothenberg, M.E., Ownbey, R.T., Celestin, J., Leder, P., and Luster, A.D.  
702 (1996). Human eotaxin is a specific chemoattractant for eosinophil cells and provides a new  
703 mechanism to explain tissue eosinophilia. *Nat. Med.* *2*, 449–456.
- 704 Grguric-Smith, L.M., Lee, H.H., Gandhi, J.A., Brennan, M.B., DeLeon-Rodriguez, C.M., Coelho,  
705 C., Han, G., and Martinez, L.R. (2015). Neutropenia exacerbates infection by *Acinetobacter*  
706 *baumannii* clinical isolates in a murine wound model. *Frontiers in Microbiology* *6*.
- 707 Gruber, C.N., Patel, R.S., Trachtman, R., Lepow, L., Amanat, F., Krammer, F., Wilson, K.M.,  
708 Onel, K., Geanon, D., Tuballes, K., et al. (2020). Mapping Systemic Inflammation and Antibody  
709 Responses in Multisystem Inflammatory Syndrome in Children (MIS-C). *Cell*.
- 710 Hansson, M., Hermansson, M., Svensson, H., Elfvin, A., Hansson, L.-E., Johnsson, E., Sjöling,  
711 A., and Quiding-Järbrink, M. (2008). CCL28 is increased in human *Helicobacter pylori*-induced  
712 gastritis and mediates recruitment of gastric immunoglobulin A-secreting cells. *Infect. Immun.*  
713 *76*, 3304–3311.
- 714 Hartl, D., Krauss-Etschmann, S., Koller, B., Hordijk, P.L., Kuijpers, T.W., Hoffmann, F., Hector,  
715 A., Eber, E., Marcos, V., Bittmann, I., et al. (2008). Infiltrated neutrophils acquire novel  
716 chemokine receptor expression and chemokine responsiveness in chronic inflammatory lung  
717 diseases. *J. Immunol.* *181*, 8053–8067.
- 718 Hernández-Ruiz, M., and Zlotnik, A. (2017). Mucosal Chemokines. *J. Interferon Cytokine Res.*  
719 *37*, 62–70.
- 720 Hieshima, K., Ohtani, H., Shibano, M., Izawa, D., Nakayama, T., Kawasaki, Y., Shiba, F.,  
721 Shiota, M., Katou, F., Saito, T., et al. (2003). CCL28 has dual roles in mucosal immunity as a  
722 chemokine with broad-spectrum antimicrobial activity. *J. Immunol.* *170*, 1452–1461.
- 723 Höchstetter, R., Dobos, G., Kimmig, D., Dulkys, Y., Kapp, A., and Elsner, J. (2000). The CC  
724 chemokine receptor 3 CCR3 is functionally expressed on eosinophils but not on neutrophils.  
725 *Eur. J. Immunol.* *30*, 2759–2764.
- 726 Hughes, C.E., and Nibbs, R.J.B. (2018). A guide to chemokines and their receptors. *FEBS J.*  
727 *285*, 2944–2971.
- 728 John, A.E., Thomas, M.S., Berlin, A.A., and Lukacs, N.W. (2005). Temporal production of  
729 CCL28 corresponds to eosinophil accumulation and airway hyperreactivity in allergic airway  
730 inflammation. *Am. J. Pathol.* *166*, 345–353.

- 731 Kitaura, M., Nakajima, T., Imai, T., Harada, S., Combadiere, C., Tiffany, H.L., Murphy, P.M., and  
732 Yoshie, O. (1996). Molecular cloning of human eotaxin, an eosinophil-selective CC chemokine,  
733 and identification of a specific eosinophil eotaxin receptor, CC chemokine receptor 3. *J. Biol.*  
734 *Chem.* *271*, 7725–7730.
- 735 Kobayashi, Y. (2008). The role of chemokines in neutrophil biology. *Front. Biosci.* *13*, 2400–  
736 2407.
- 737 Kobayashi, S.D., Voyich, J.M., Buhl, C.L., Stahl, R.M., and DeLeo, F.R. (2002). Global changes  
738 in gene expression by human polymorphonuclear leukocytes during receptor-mediated  
739 phagocytosis: cell fate is regulated at the level of gene expression. *Proc. Natl. Acad. Sci. U. S.*  
740 *A.* *99*, 6901–6906.
- 741 Lammers, A.J.J., de Porto, A.P.N.A., de Boer, O.J., Florquin, S., and van der Poll, T. (2012).  
742 The role of TLR2 in the host response to pneumococcal pneumonia in absence of the spleen.  
743 *BMC Infect. Dis.* *12*, 139.
- 744 Lee, D.S., Lee, K.L., Jeong, J.B., Shin, S., Kim, S.H., and Kim, J.W. (2020a). Expression of  
745 Chemokine CCL28 in Ulcerative Colitis Patients. *Gut Liver.*
- 746 Lee, H.H., Aslanyan, L., Vidyasagar, A., Brennan, M.B., Tauber, M.S., Carrillo-Sepulveda, M.A.,  
747 Dores, M.R., Rigel, N.W., and Martinez, L.R. (2020b). Depletion of Alveolar Macrophages  
748 Increases Pulmonary Neutrophil Infiltration, Tissue Damage, and Sepsis in a Murine Model of  
749 *Acinetobacter baumannii* Pneumonia. *Infect. Immun.* *88*.
- 750 Lin, L., Nonejuie, P., Munguia, J., Hollands, A., Olson, J., Dam, Q., Kumaraswamy, M., Rivera,  
751 H., Jr, Corriden, R., Rohde, M., et al. (2015). Azithromycin Synergizes with Cationic  
752 Antimicrobial Peptides to Exert Bactericidal and Therapeutic Activity Against Highly Multidrug-  
753 Resistant Gram-Negative Bacterial Pathogens. *EBioMedicine* *2*, 690–698.
- 754 Liu, W., Tao, Z.-W., Wang, L., Yuan, M.-L., Liu, K., Zhou, L., Wei, S., Deng, Y., Liu, J., Liu, H.-  
755 G., et al. (2020). Analysis of factors associated with disease outcomes in hospitalized patients  
756 with 2019 novel coronavirus disease. *Chin. Med. J.* *133*, 1032–1038.
- 757 Marchelletta, R.R., Gareau, M.G., Okamoto, S., Guiney, D.G., Barrett, K.E., and Fierer, J.  
758 (2015). Salmonella-induced Diarrhea Occurs in the Absence of IL-8 Receptor (CXCR2)-  
759 Dependent Neutrophilic Inflammation. *J. Infect. Dis.* *212*, 128–136.
- 760 Marcos, V., Zhou, Z., Yildirim, A.Ö., Bohla, A., Hector, A., Vitkov, L., Wiedenbauer, E.-M.,  
761 Krautgartner, W.D., Stoiber, W., Belohradsky, B.H., et al. (2010). CXCR2 mediates NADPH  
762 oxidase-independent neutrophil extracellular trap formation in cystic fibrosis airway  
763 inflammation. *Nat. Med.* *16*, 1018–1023.
- 764 Matsuo, K., Nagakubo, D., Yamamoto, S., Shigeta, A., Tomida, S., Fujita, M., Hirata, T.,  
765 Tsunoda, I., Nakayama, T., and Yoshie, O. (2018). CCL28-Deficient Mice Have Reduced IgA  
766 Antibody-Secreting Cells and an Altered Microbiota in the Colon. *J. Immunol.* *200*, 800–809.
- 767 Mohan, T., Deng, L., and Wang, B.-Z. (2017). CCL28 chemokine: An anchoring point bridging  
768 innate and adaptive immunity. *Int. Immunopharmacol.* *51*, 165–170.
- 769 Moschen, A.R., Gerner, R.R., Wang, J., Klepsch, V., Adolph, T.E., Reider, S.J., Hackl, H.,  
770 Pfister, A., Schilling, J., Moser, P.L., et al. (2016). Lipocalin 2 Protects from Inflammation and

- 771 Tumorigenesis Associated with Gut Microbiota Alterations. *Cell Host Microbe* 19, 455–469.
- 772 Nomiyama, H., Osada, N., and Yoshie, O. (2013). Systematic classification of vertebrate  
773 chemokines based on conserved synteny and evolutionary history. *Genes Cells* 18, 1–16.
- 774 Nouailles, G., Dorhoi, A., Koch, M., Zerrahn, J., Weiner, J., 3rd, Faé, K.C., Arrey, F., Kuhlmann,  
775 S., Bandermann, S., Loewe, D., et al. (2014). CXCL5-secreting pulmonary epithelial cells drive  
776 destructive neutrophilic inflammation in tuberculosis. *J. Clin. Invest.* 124, 1268–1282.
- 777 Ogawa, H., Imura, M., Eckmann, L., and Kagnoff, M.F. (2004). Regulated production of the  
778 chemokine CCL28 in human colon epithelium. *Am. J. Physiol. Gastrointest. Liver Physiol.* 287,  
779 G1062–G1069.
- 780 O’Gorman, M.T., Jatoi, N.A., Lane, S.J., and Mahon, B.P. (2005). IL-1beta and TNF-alpha  
781 induce increased expression of CCL28 by airway epithelial cells via an NFkappaB-dependent  
782 pathway. *Cell. Immunol.* 238, 87–96.
- 783 Pan, J., Kunkel, E.J., Gosslar, U., Lazarus, N., Langdon, P., Broadwell, K., Vierra, M.A.,  
784 Genovese, M.C., Butcher, E.C., and Soler, D. (2000). Cutting Edge: A Novel Chemokine Ligand  
785 for CCR10 And CCR3 Expressed by Epithelial Cells in Mucosal Tissues. *The Journal of*  
786 *Immunology* 165, 2943–2949.
- 787 Perez-Lopez, A., Behnsen, J., Nuccio, S.-P., and Raffatellu, M. (2016). Mucosal immunity to  
788 pathogenic intestinal bacteria. *Nat. Rev. Immunol.* 16, 135–148.
- 789 Raffatellu, M., George, M.D., Akiyama, Y., Hornsby, M.J., Nuccio, S.-P., Paixao, T.A., Butler,  
790 B.P., Chu, H., Santos, R.L., Berger, T., et al. (2009). Lipocalin-2 resistance confers an  
791 advantage to *Salmonella enterica* serotype Typhimurium for growth and survival in the inflamed  
792 intestine. *Cell Host Microbe* 5, 476–486.
- 793 Rudd, J.M., Pulavendran, S., Ashar, H.K., Ritchey, J.W., Snider, T.A., Malayer, J.R., Marie, M.,  
794 Chow, V.T.K., and Narasaraju, T. (2019). Neutrophils Induce a Novel Chemokine Receptors  
795 Repertoire During Influenza Pneumonia. *Front. Cell. Infect. Microbiol.* 9, 108.
- 796 Sabroe, I., Jones, E.C., Whyte, M.K.B., and Dower, S.K. (2005). Regulation of human neutrophil  
797 chemokine receptor expression and function by activation of Toll-like receptors 2 and 4.  
798 *Immunology* 115, 90–98.
- 799 Shamri, R., Melo, R.C.N., Young, K.M., Bivas-Benita, M., Xenakis, J.J., Spencer, L.A., and  
800 Weller, P.F. (2012). CCL11 elicits secretion of RNases from mouse eosinophils and their cell-  
801 free granules. *FASEB J.* 26, 2084–2093.
- 802 Spencer, L.A., Melo, R.C.N., Perez, S.A.C., Bafford, S.P., Dvorak, A.M., and Weller, P.F.  
803 (2006). Cytokine receptor-mediated trafficking of preformed IL-4 in eosinophils identifies an  
804 innate immune mechanism of cytokine secretion. *Proc. Natl. Acad. Sci. U. S. A.* 103, 3333–  
805 3338.
- 806 Stojiljkovic, I., Bäumlner, A.J., and Heffron, F. (1995). Ethanolamine utilization in *Salmonella*  
807 typhimurium: nucleotide sequence, protein expression, and mutational analysis of the cchA  
808 cchB eutE eutJ eutG eutH gene cluster. *J. Bacteriol.* 177, 1357–1366.
- 809 Tsuchiya, T., Nakao, N., Yamamoto, S., Hirai, Y., Miyamoto, K., and Tsujibo, H. (2012). NK1. 1+

- 810 cells regulate neutrophil migration in mice with *Acinetobacter baumannii* pneumonia. *Microbiol.*  
811 *Immunol.* 56, 107–116.
- 812 Uribe-Querol, E., and Rosales, C. (2020). Phagocytosis: Our Current Understanding of a  
813 Universal Biological Process. *Front. Immunol.* 11, 1066.
- 814 Van Faassen, H., KuoLee, R., Harris, G., Zhao, X., Conlan, J.W., and Chen, W. (2007).  
815 Neutrophils play an important role in host resistance to respiratory infection with *Acinetobacter*  
816 *baumannii* in mice. *Infect. Immun.* 75, 5597–5608.
- 817 Vassiloyanakopoulos, A.P., Okamoto, S., and Fierer, J. (1998). The crucial role of  
818 polymorphonuclear leukocytes in resistance to *Salmonella dublin* infections in genetically  
819 susceptible and resistant mice. *Proc. Natl. Acad. Sci. U. S. A.* 95, 7676–7681.
- 820 Veras, F.P., Pontelli, M.C., Silva, C.M., Toller-Kawahisa, J.E., de Lima, M., Nascimento, D.C.,  
821 Schneider, A.H., Caetité, D., Tavares, L.A., Paiva, I.M., et al. (2020). SARS-CoV-2-triggered  
822 neutrophil extracellular traps mediate COVID-19 pathology. *J. Exp. Med.* 217.
- 823 Wang, W., Soto, H., Oldham, E.R., Buchanan, M.E., Homey, B., Catron, D., Jenkins, N.,  
824 Copeland, N.G., Gilbert, D.J., Nguyen, N., et al. (2000). Identification of a novel chemokine  
825 (CCL28), which binds CCR10 (GPR2). *J. Biol. Chem.* 275, 22313–22323.
- 826 White, J.R., Lee, J.M., Dede, K., Imburgia, C.S., Jurewicz, A.J., Chan, G., Fornwald, J.A.,  
827 Dhanak, D., Christmann, L.T., Darcy, M.G., et al. (2000). Identification of potent, selective non-  
828 peptide CC chemokine receptor-3 antagonist that inhibits eotaxin-, eotaxin-2-, and monocyte  
829 chemotactic protein-4-induced eosinophil migration. *J. Biol. Chem.* 275, 36626–36631.
- 830 Yamada, K., Yanagihara, K., Kaku, N., Harada, Y., Migiyama, Y., Nagaoka, K., Morinaga, Y.,  
831 Nakamura, S., Imamura, Y., Miyazaki, T., et al. (2013). Azithromycin attenuates lung  
832 inflammation in a mouse model of ventilator-associated pneumonia by multidrug-resistant  
833 *Acinetobacter baumannii*. *Antimicrob. Agents Chemother.* 57, 3883–3888.
- 834 Yaman, Y., Devrim, İ., Ozek, G., Demirağ, B., Oymak, Y., Gülfidan, G., and Vergin, C. (2018).  
835 Non-typhoidal *Salmonella* bacteraemia in paediatric leukaemia patients. *Contemp. Oncol.* 22,  
836 105–107.
- 837 Yan Yan, Jiang, X., Wang, X., Liu, B., Ding, H., Jiang, M., Yang, Z., Dai, Y., Ding, D., Yu, H., et  
838 al. (2020). CCL28 mucosal expression in SARS-CoV-2-infected patients with diarrhea in relation  
839 to disease severity. *J. Infect.* 4822.
- 840 Zeng, X., Gu, H., Cheng, Y., Jia, K.-R., Liu, D., Yuan, Y., Chen, Z.-F., Peng, L.-S., Zou, Q.-M.,  
841 and Shi, Y. (2019). A lethal pneumonia model of *Acinetobacter baumannii*: an investigation in  
842 immunocompetent mice. *Clin. Microbiol. Infect.* 25, 516.e1–e516.e4.
- 843 Zeng, X., Gu, H., Peng, L., Yang, Y., Wang, N., Shi, Y., and Zou, Q. (2020). Transcriptome  
844 Profiling of Lung Innate Immune Responses Potentially Associated With the Pathogenesis of  
845 *Acinetobacter baumannii* Acute Lethal Pneumonia. *Front. Immunol.* 11, 708.
- 846 Zlotnik, A., and Yoshie, O. (2000). Chemokines: a new classification system and their role in  
847 immunity. *Immunity* 12, 121–127.
- 848 Zlotnik, A., Burkhardt, A.M., and Homey, B. (2011). Homeostatic chemokine receptors and

849 organ-specific metastasis. *Nat. Rev. Immunol.* *11*, 597–606.

850

851 FIGURES AND LEGENDS

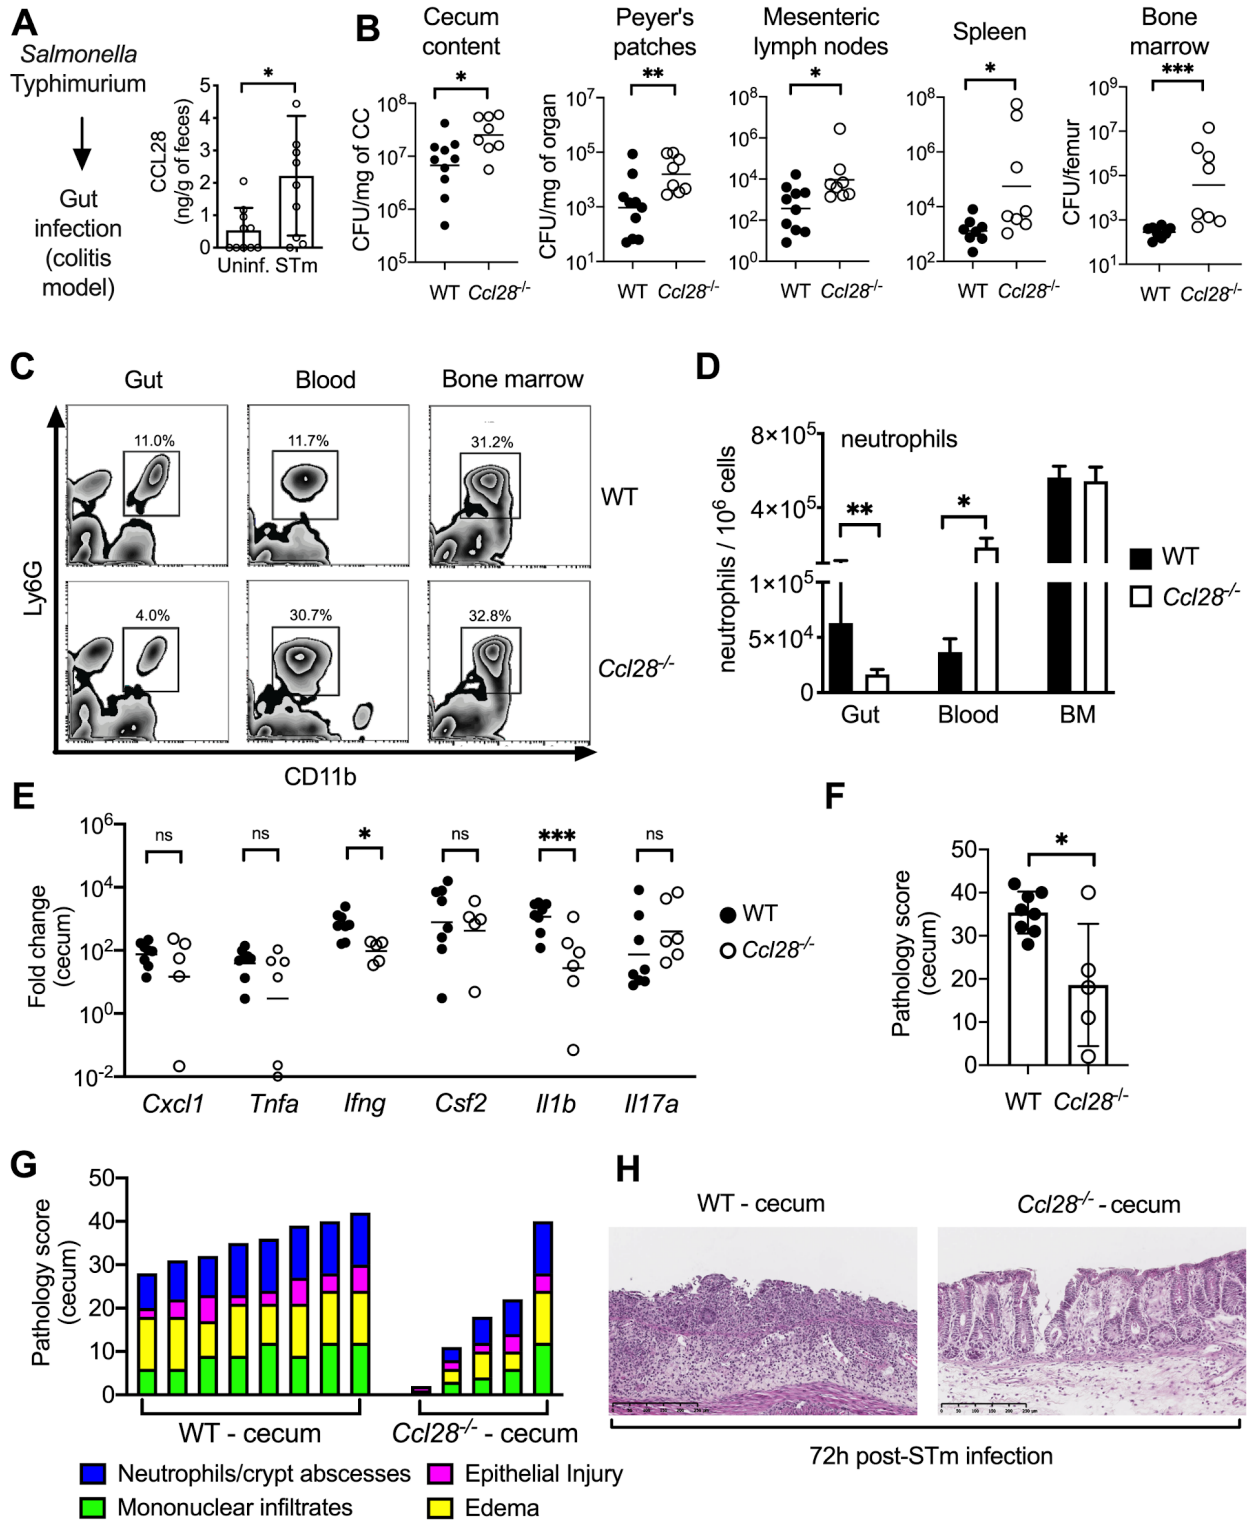

852 Figure 1



853 **Figure 1. CCL28 confers protection during *Salmonella* colitis and mediates the recruitment**  
854 **of neutrophils to the gut. (A)** For the colitis model, wild-type mice were gavaged with  
855 streptomycin 24h prior to oral infection with *S. enterica* serovar Typhimurium (STm). At 96h post-  
856 infection, CCL28 in feces was quantified by ELISA. Data shown comprise two independent  
857 experiments (uninfected, n=10; STm, n=10). Bars represent the mean  $\pm$  SD. **(B)** CFU in cecum  
858 content, Peyer's patches, mesenteric lymph nodes, spleen, and bone marrow were determined  
859 at 72h post-infection of wild-type (WT, black circles) and *Ccl28*<sup>-/-</sup> (white circles) littermate mice.  
860 Data shown comprise three independent experiments (WT, n=10; *Ccl28*<sup>-/-</sup>, n=8). Bars represent  
861 the geometric mean. **(C)** Representative contour plots of neutrophils (CD11b<sup>+</sup> Ly6G<sup>+</sup> cells; gated  
862 on live, CD45<sup>+</sup> cells) obtained from the gut, blood, and bone marrow of STm-infected WT or *Ccl28*<sup>-/-</sup>  
863 mice, as determined by flow cytometry at 48h post-infection. **(D)** Frequency of neutrophils per  
864 million live cells obtained from the gut, blood, and bone marrow of STm-infected WT (black bars)  
865 or *Ccl28*<sup>-/-</sup> mice (white bars). Data shown comprise three independent experiments (WT, n=15;  
866 *Ccl28*<sup>-/-</sup>, n=15). Bars represent the mean  $\pm$  SD. **(E)** Relative expression levels (qPCR) of *Cxcl1*  
867 (CXCL1), *Tnfa* (TNF $\alpha$ ), *Ifng* (IFN $\gamma$ ), *Csf2* (GM-CSF), *Il1b* (IL-1 $\beta$ ), and *Il17a* (IL-17A) in the cecum  
868 of WT (black circles, n=8) or *Ccl28*<sup>-/-</sup> mice (white circles, n=6). Bars represent the geometric mean.  
869 Data shown comprise three independent experiments. **(F-H)** Histopathological analysis of cecum  
870 collected from STm-infected WT or *Ccl28*<sup>-/-</sup> mice (WT, n=8; *Ccl28*<sup>-/-</sup>, n=5). **(F)** Sum of the total  
871 histopathology score, **(G)** histopathology scores showing the analyzed parameters, and **(H)** H&E-  
872 stained sections from one representative animal for each group (200X). **(F)** Bars represent the  
873 mean  $\pm$  SD. A significant change (Mann-Whitney U) relative to WT controls is indicated by \* $p \leq$   
874 0.05, \*\* $p \leq$  0.01, \*\*\* $p \leq$  0.001. ns = not significant.

875

876

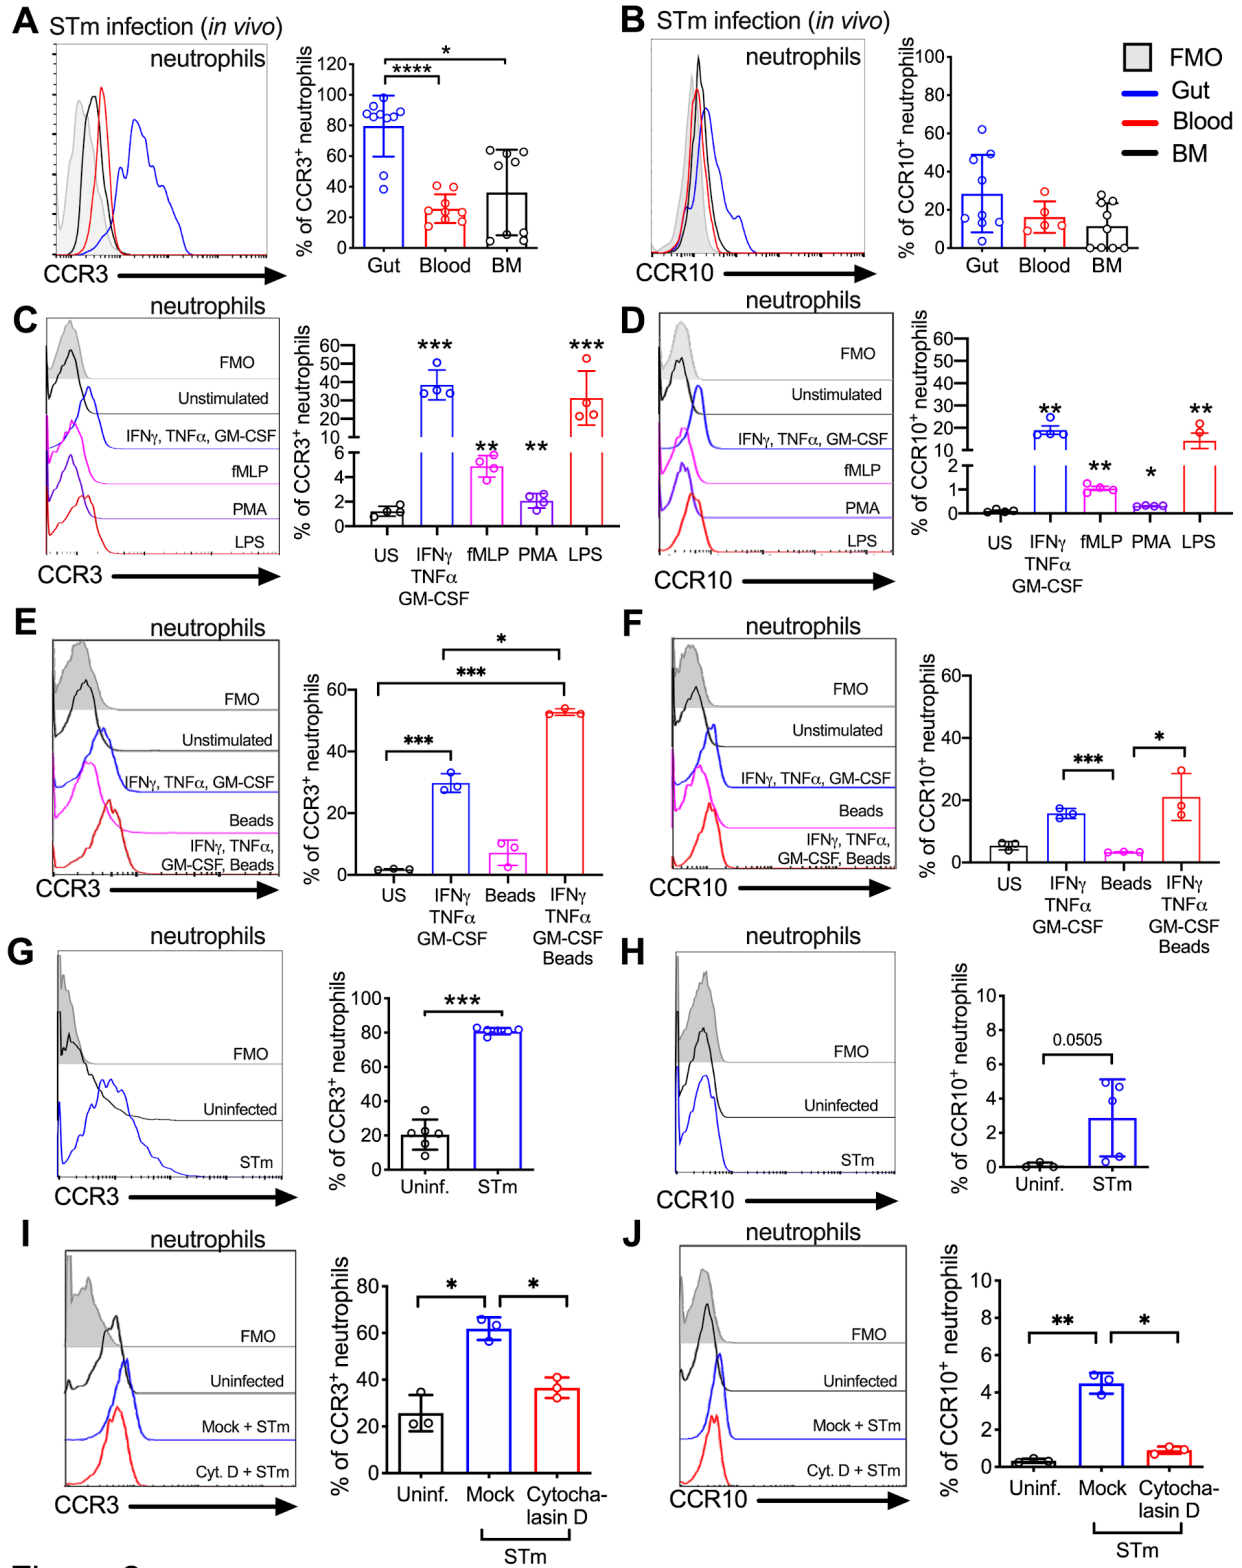

Figure 2

877

878



879 **Figure 2. Surface expression of the CCL28 receptors CCR3 and CCR10 on neutrophils**  
880 **upon stimulation with proinflammatory stimuli and phagocytosis. (A-B)** Surface expression  
881 of **(A)** CCR3 or **(B)** CCR10 on neutrophils obtained from the gut, blood, and bone marrow 72h  
882 post-infection with STm, analyzed by flow cytometry. Left panels show representative histograms  
883 of **(A)** CCR3 or **(B)** CCR10 expression on the surface of neutrophils (gated on live, CD45<sup>+</sup> CD11b<sup>+</sup>  
884 Ly6G<sup>+</sup> cells) from the gut (blue), blood (red), and bone marrow (BM; black). Right panels show  
885 the percentage of **(A)** CCR3<sup>+</sup> or **(B)** CCR10<sup>+</sup> neutrophils obtained from gut, blood, and BM. Data  
886 are from two independent experiments. **(C-F)** Bone marrow neutrophils were unstimulated or  
887 treated with the indicated stimuli for 4h. Surface expression of **(C, E)** CCR3 and **(D, F)** CCR10 on  
888 neutrophils was determined by flow cytometry. Left panels show representative histograms of **(C,**  
889 **E)** CCR3 or **(D, F)** CCR10 surface expression after stimulation with: **(C, D)** cytokines TNF $\alpha$  + IFN $\gamma$   
890 + GM-CSF (blue); fMLP (magenta); PMA, (purple); LPS (red); **(E, F)** cytokines TNF $\alpha$  + IFN $\gamma$  +  
891 GM-CSF (blue); beads alone (magenta); cytokines plus beads (red). Right panels show the  
892 percentage of **(C, E)** CCR3<sup>+</sup> or **(D, F)** CCR10<sup>+</sup> neutrophils following stimulation with the indicated  
893 stimuli. US = unstimulated. Data shown are representative of two independent experiments. **(G,**  
894 **H)** Bone marrow neutrophils were infected with opsonized *S. Typhimurium* at a multiplicity of  
895 infection (MOI)=10 for 1h. Surface expression of **(G)** CCR3 or **(H)** CCR10 was determined by flow  
896 cytometry. Data are from two independent experiments. **(I, J)** Bone marrow neutrophils were  
897 treated with cytochalasin D or mock-treated with DMSO (vehicle) for 30 min before infection with  
898 opsonized STm for 1h at an MOI=10. Surface expression of **(I)** CCR3 or **(J)** CCR10 was  
899 determined by flow cytometry. Data shown is representative of two independent experiments. Left  
900 panels show representative histograms of surface receptor staining on neutrophils, and right  
901 panels show the percentages. **(A-J, right panels)** Bars represent the mean  $\pm$  SD. **(A-F, I, J)** Data  
902 was analyzed by one-way ANOVA on log-transformed data. **(G, H)** Data was analyzed by paired  
903 *t* test. Significant changes are indicated by \* $p \leq 0.05$ , \*\* $p \leq 0.01$ , \*\*\* $p \leq 0.001$ , \*\*\*\* $p \leq 0.0001$ .

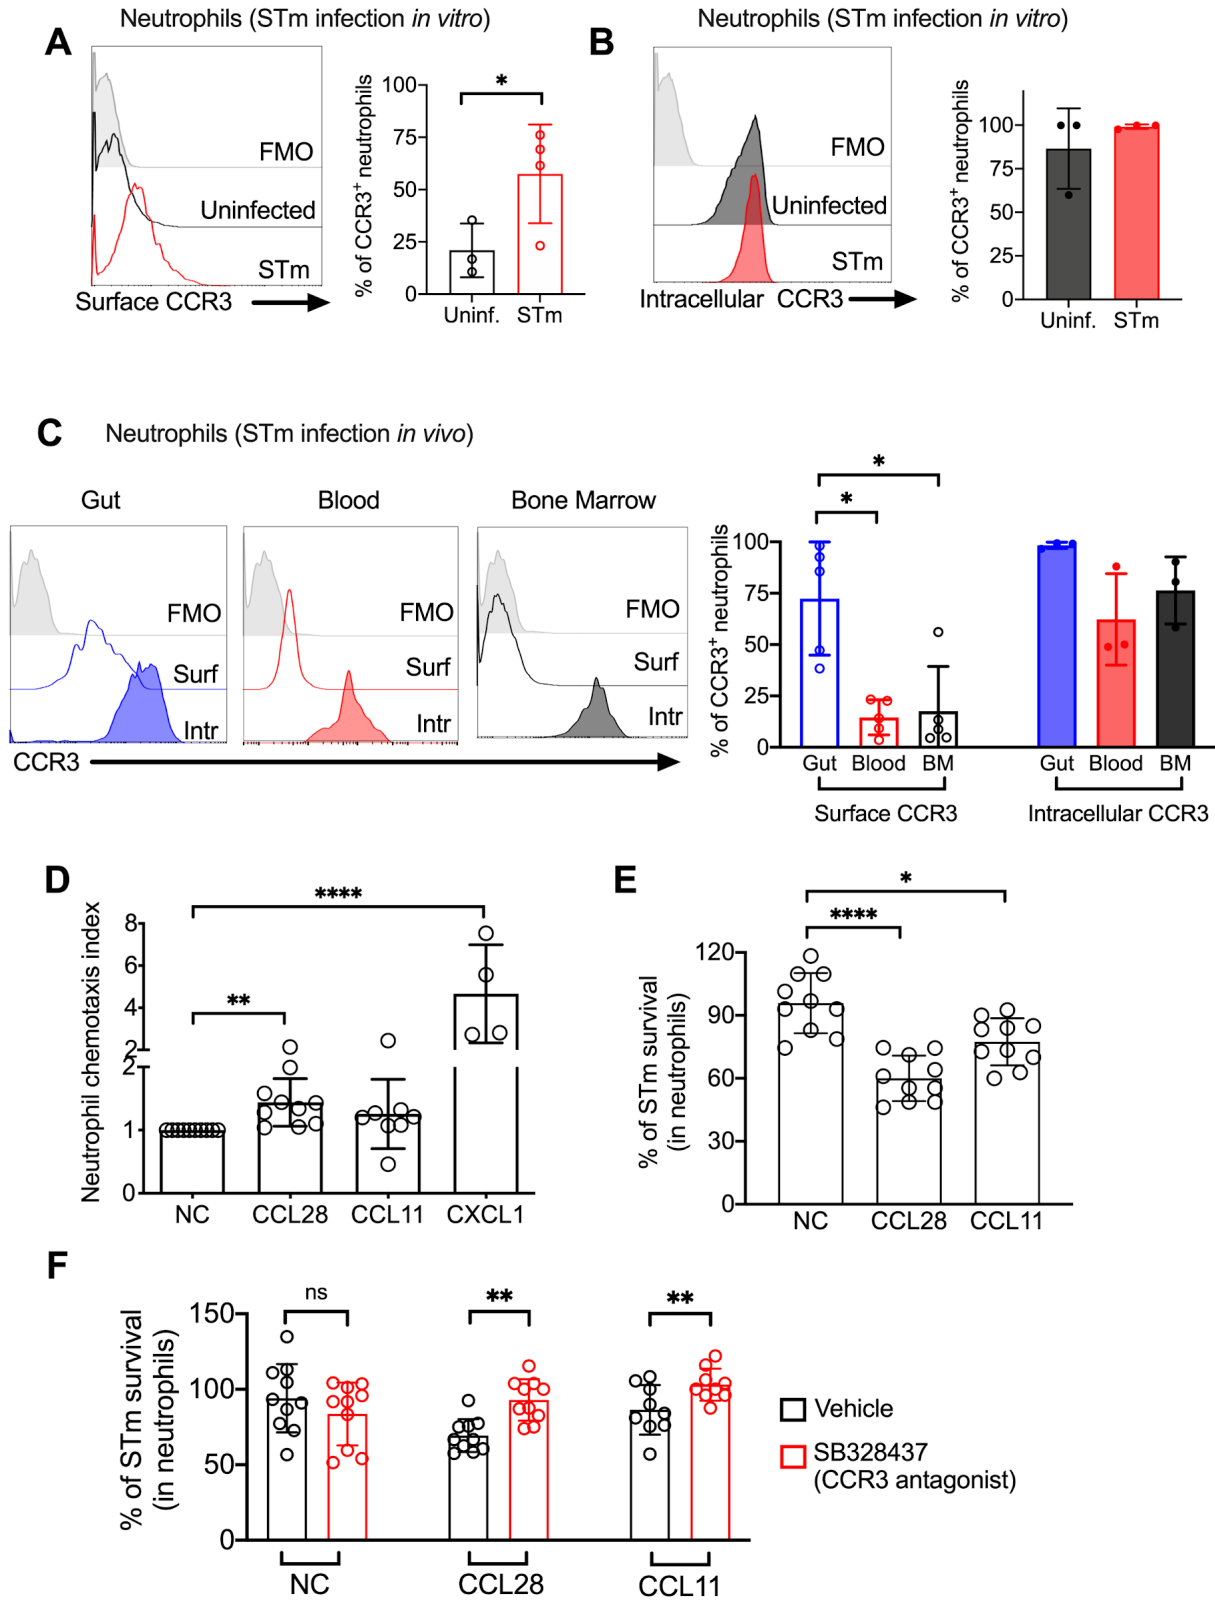

904

Figure 3

905 **Figure 3. CCL28 modulates neutrophil chemotaxis and antimicrobial activity.** (A, B) Bone  
906 marrow neutrophils were infected with opsonized STm at MOI=10 for 1h. (A) Surface CCR3 or  
907 (B) intracellular CCR3 were detected by flow cytometry. (C) Neutrophils were obtained from the  
908 gut, blood, and bone marrow 72h post-infection with STm. Surface (clear histograms) or  
909 intracellular (solid histograms) CCR3 expression was analyzed by flow cytometry. (A-C) Left  
910 panels show representative histograms, and right panels show the percentage of neutrophils  
911 expressing CCR3 on their surface (clear bars) or intracellularly (solid bars). (D) Bone marrow  
912 neutrophils were stimulated with TNF $\alpha$  + IFN $\gamma$  + GM-CSF for 4h before adding  $1 \times 10^6$  cells to the  
913 upper compartment of a transwell chamber for chemotaxis assays. Each of the chemokines  
914 (CCL28, CCL11, or CXCL1), or no chemokine (NC), were placed in separate lower  
915 compartments. The transwell plate was incubated for 2h at 37°C. Cells that migrated to the lower  
916 compartment were enumerated by flow cytometry. Neutrophil chemotaxis index was calculated  
917 by taking the number of cells that migrated in response to a chemokine and dividing it by the  
918 number of cells that migrated in the absence of a chemokine. Data are from four independent  
919 experiments. (E) Opsonized STm ( $1 \times 10^7$  CFU) was cultured alone, or added to bone marrow  
920 neutrophils ( $1 \times 10^6$  cells) stimulated with CCL28, CCL11, or no chemokine, for 2.5h at 37°C. CFU  
921 were enumerated by plating serial dilutions. Percentage of STm survival was calculated for each  
922 condition by taking the CFU from bacteria incubated with neutrophils and dividing it by the CFU  
923 from bacteria incubated without neutrophils, multiplied by 100. Data shown comprise three  
924 independent experiments. (F) The effect of the CCR3 antagonist SB328437 on neutrophil-  
925 mediated STm killing was evaluated by performing the experiment as described in panel (E), with  
926 or without the antagonist. Data shown comprise three independent experiments. (A-F) Bars  
927 represent the mean  $\pm$  SD. Data was analyzed by one-way ANOVA on log-transformed data. (F)  
928 Data was analyzed by paired *t* test. Significant changes are indicated by \* $p \leq 0.05$ , \*\* $p \leq 0.01$ ,  
929 \*\*\*\* $p \leq 0.0001$ . ns = not significant.

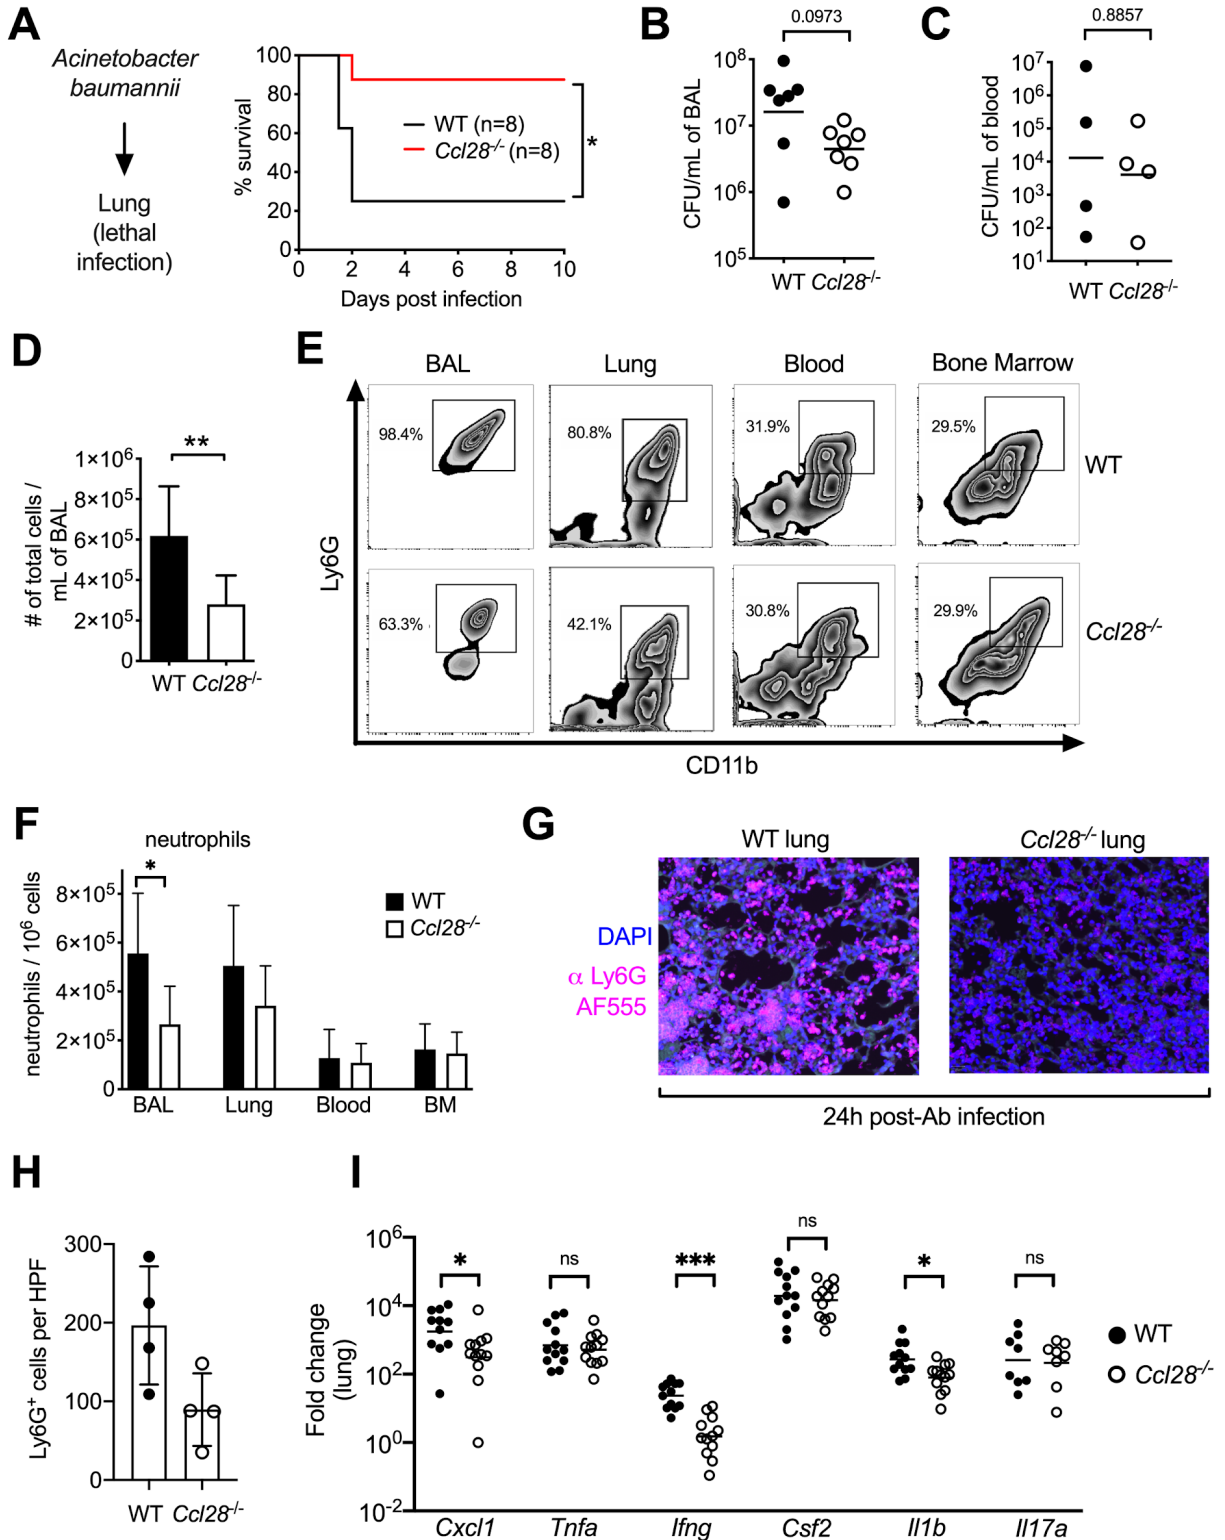

Figure 4

930

931

932 **Figure 4. Absence of CCL28 confers protection in a lethal *Acinetobacter pneumonia* model.**

933 (A) WT mice (black line) and *Ccl28*<sup>-/-</sup> mice (red line) were intratracheally infected with  
934 *Acinetobacter baumannii* (Ab) and their survival was determined for 10 days. Data shown  
935 comprise two independent experiments (WT, n=8; *Ccl28*<sup>-/-</sup>, n=8). (B-F) WT and *Ccl28*<sup>-/-</sup> mice were  
936 compared 24h post-infection with Ab. (B, C) Ab CFU in (B) BAL (bronchoalveolar lavage) fluid or  
937 (C) blood in WT mice (black circles) and *Ccl28*<sup>-/-</sup> mice (white circles). (D) The number of total host  
938 cells per mL of BAL, as determined by flow cytometry. (E, F) Representative (E) contour plots of  
939 neutrophils (CD11b<sup>+</sup> Ly6G<sup>+</sup> cells; gated on live, CD45<sup>+</sup> cells) and (F) frequency of neutrophils  
940 obtained from the BAL, lung, blood, and bone marrow of Ab-infected WT or *Ccl28*<sup>-/-</sup> mice, as  
941 determined by flow cytometry. Data comprise two independent experiments (WT, n=8; *Ccl28*<sup>-/-</sup>,  
942 n=8). Bars represent (B, C) the geometric mean or (D, F) the mean  $\pm$  SD. (G) Representative  
943 immunofluorescence image showing Ly6G<sup>+</sup> cells (magenta) in the lungs of WT and *Ccl28*<sup>-/-</sup> mice  
944 24h post-Ab infection. DAPI (blue) was used to label nuclei. (H) Quantification of Ly6G<sup>+</sup> cells per  
945 high-power field (HPF) from immunofluorescence images of lungs from WT mice (n=4) and *Ccl28*<sup>-/-</sup>  
946 mice (n=4). Bars represent the mean  $\pm$  SD. (I) Relative expression levels (qPCR) of *Cxcl1*  
947 (CXCL1), *Tnfa* (TNF $\alpha$ ), *Ifng* (IFN $\gamma$ ), *Csf2* (GM-CSF), *Il1b* (IL-1 $\beta$ ), and *Il17a* (IL-17A) in the lung of  
948 WT (black circles, n=12) or *Ccl28*<sup>-/-</sup> mice (white circles, n=12) infected with Ab. Bars represent the  
949 geometric mean. Data shown comprise three independent experiments. A significant change  
950 (Mann-Whitney U) relative to WT controls is indicated by \* $p \leq 0.05$ , \*\* $p \leq 0.01$ , \*\*\* $p \leq 0.001$ . ns  
951 = not significant.

952

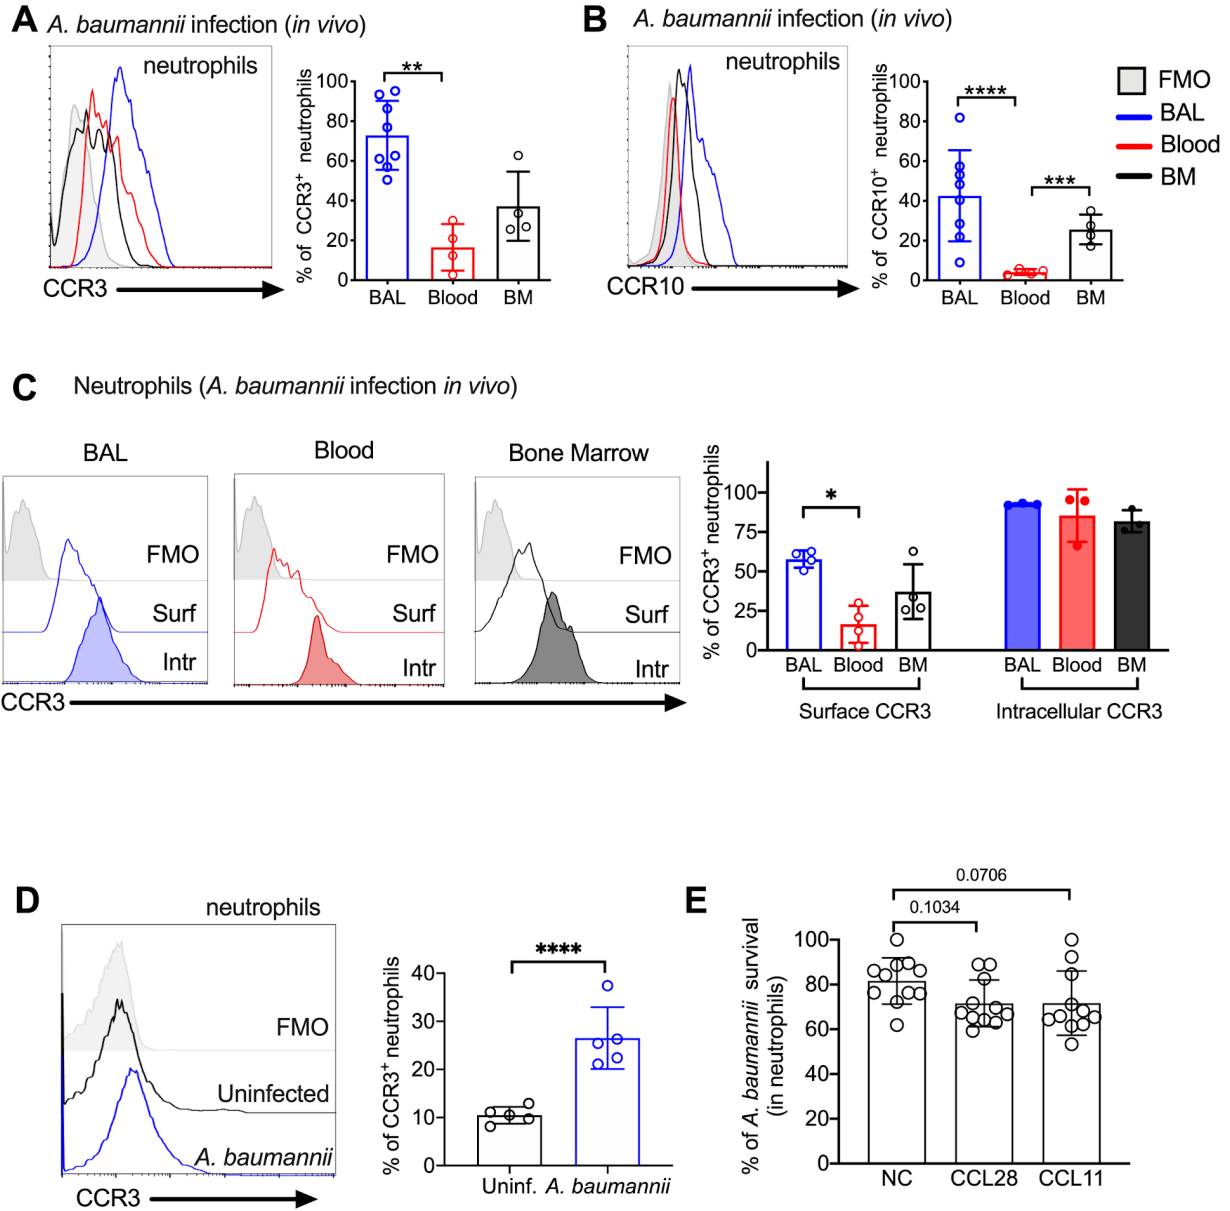

Figure 5

953

954

955

956 **Figure 5. Lung neutrophils express CCR3 and CCR10 in an *Acinetobacter* lethal pneumonia**  
957 **model.** WT mice were infected with *A. baumannii* (Ab) for 24h. **(A-C)** Cells obtained from BAL,  
958 blood, and bone marrow were analyzed by flow cytometry to determine: **(A)** CCR3 or **(B)** CCR10  
959 surface expression on neutrophils (CD11b<sup>+</sup> Ly6G<sup>+</sup> cells; gated on live, CD45<sup>+</sup> cells); **(C)** Surface  
960 (clear histograms) or intracellular (solid histograms) CCR3 expression in neutrophils. Data shown  
961 comprise two independent experiments. **(A-C)** Left panels show representative histograms, and  
962 right panels show the percentage of neutrophils expressing the indicated receptor on their surface  
963 (clear bars) or intracellularly (solid bars). **(D)** Bone marrow neutrophils were infected with  
964 opsonized Ab at an MOI=10 for 1h. Surface CCR3 was determined by flow cytometry. Left panel  
965 shows representative histograms of CCR3 expression, and the right panel shows the percentage  
966 of CCR3<sup>+</sup> neutrophils. Data are from two independent experiments. **(E)** Opsonized Ab (1x10<sup>7</sup>  
967 CFU) was cultured alone, or added to bone marrow neutrophils (1x10<sup>6</sup> cells) stimulated with  
968 CCL28, CCL11, or no chemokine (NC), for 4.5h at 37°C. CFU were enumerated by plating serial  
969 dilutions. Percentage of Ab survival was calculated for each condition by taking the CFU from  
970 bacteria incubated with neutrophils and dividing it by the CFU from bacteria incubated without  
971 neutrophils, multiplied by 100. Data shown comprise three independent experiments. Bars  
972 represent the mean ± SD. **(A-C, E)** Data was analyzed by one-way ANOVA on log-transformed  
973 data. **(D)** Data was analyzed by paired *t* test. Significant changes are indicated by \**p* ≤ 0.05, \*\**p*  
974 ≤ 0.01, \*\*\**p* ≤ 0.001, \*\*\*\**p* ≤ 0.0001.

975

976

977

978

979 SUPPLEMENTAL FIGURES

**A**

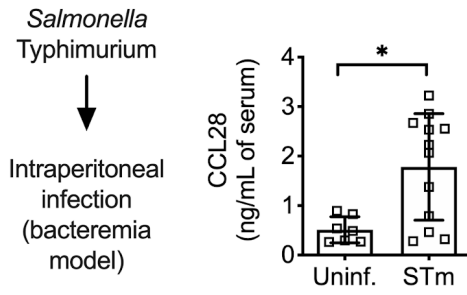

**B**

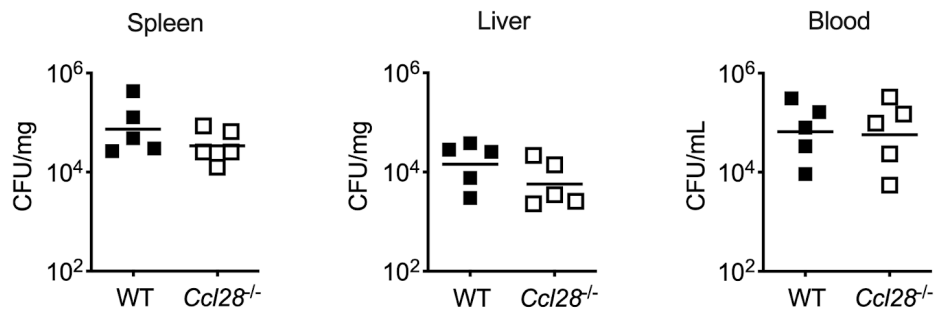

**C**

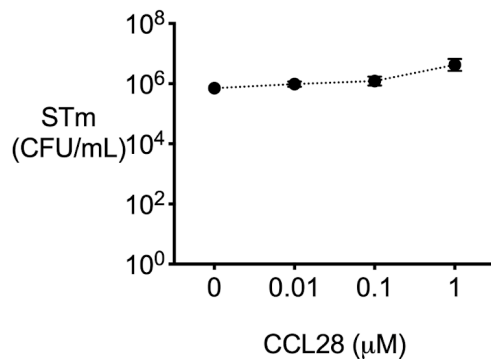

**D**

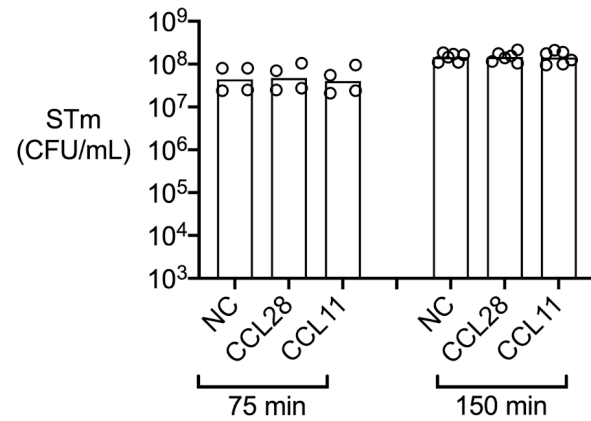



981 **Supplementary Figure 1. CCL28 does not confer protection in a *Salmonella***  
982 **bacteremia model, and lacks direct antimicrobial activity against *Salmonella*.**

983 **(A, B)** For the bacteremia model, mice were infected by intraperitoneal injection with *S.*  
984 Typhimurium (STm,  $1 \times 10^3$  CFU) or sterile PBS (uninfected control). **(A)** At 96h post-infection,  
985 CCL28 in serum was quantified by ELISA of wild-type mice (uninfected,  $n=7$ ; STm,  $n=12$ ). Data  
986 shown comprise two independent experiments. Bars represent the mean  $\pm$  SD. **(B)** STm CFU  
987 was determined in the spleen, liver, and blood of WT mice (black squares) and *Ccl28*<sup>-/-</sup> mice (white  
988 squares) 96h after intraperitoneal infection with STm ( $1 \times 10^3$  CFU). Data shown comprise two  
989 independent experiments (WT,  $n=5$ ; *Ccl28*<sup>-/-</sup>,  $n=5$ ). **(C, D)** *In vitro* antimicrobial activity of CCL28  
990 against STm. **(C)** STm ( $0.5 \times 10^6$  CFU/mL) was incubated with recombinant murine CCL28 at the  
991 indicated concentrations ( $n=6$  per group) and CFU were enumerated after 2h. **(D)** STm ( $1 \times 10^7$   
992 CFU/mL) was incubated with recombinant murine CCL28 (50 nM) or CCL11 (25 nM) and CFU  
993 were enumerated at 75 min ( $n=4$  per group) and 150 min ( $n=6$  per group). Bars represent the  
994 geometric mean. A significant change (Mann-Whitney U) relative to uninfected controls is  
995 indicated by  $*p \leq 0.05$ .

996

997

998

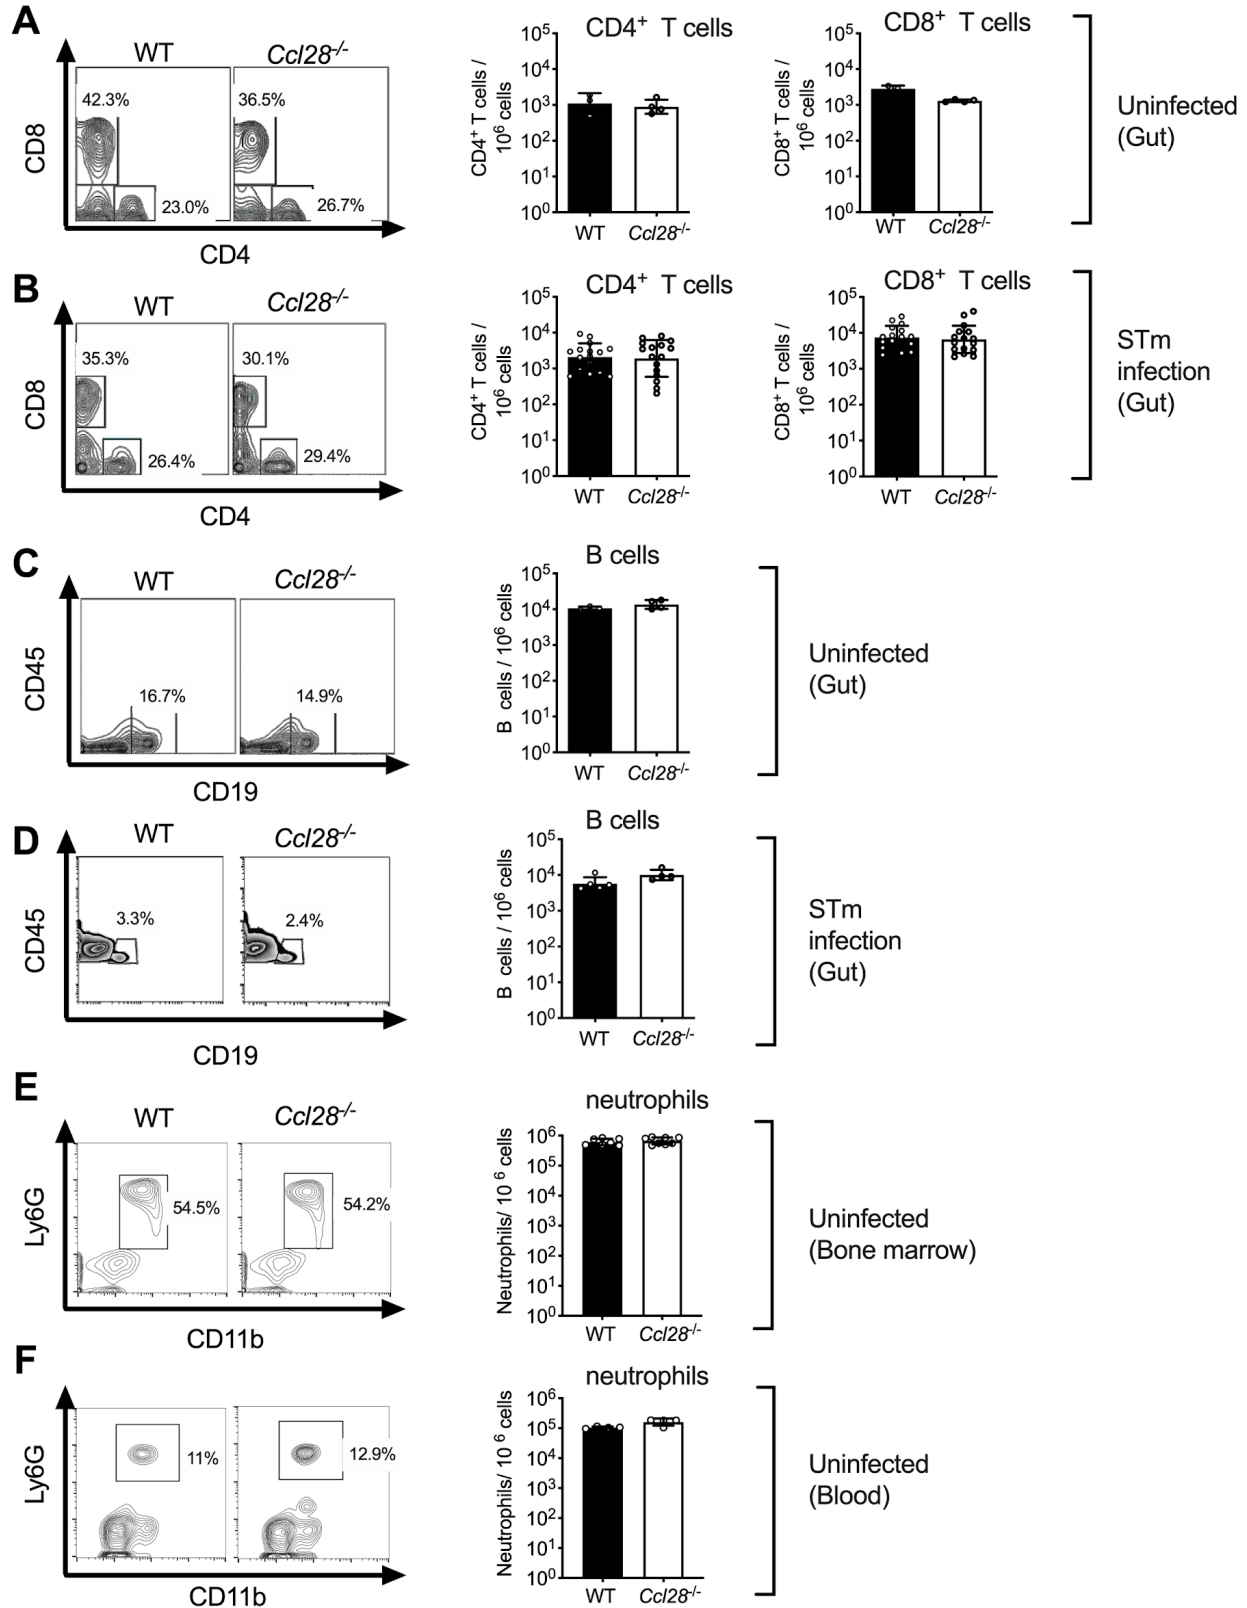

1000 **Supplementary Figure 2. Wild-type and *Ccl28*<sup>-/-</sup> mice exhibit similar numbers of T and B**  
1001 **cells, as well as bone marrow and blood neutrophils.**

1002 Flow cytometry analysis of (A, B) CD4<sup>+</sup> and CD8<sup>+</sup> T cells, and (C, D) CD19<sup>+</sup> B cells isolated from  
1003 the gut of (A, C) uninfected WT and *Ccl28*<sup>-/-</sup> mice or (B, D) WT and *Ccl28*<sup>-/-</sup> mice infected with STm  
1004 for 48h (colitis model; see also Fig. 1). (E, F) Cells from (E) bone marrow or (F) blood of uninfected  
1005 WT (black bars) or *Ccl28*<sup>-/-</sup> (white bars) mice were analyzed by flow cytometry to determine the  
1006 percentage and number of neutrophils. (A-F) Left panels show representative contour plots. Right  
1007 panels show the frequency of the indicated cells per million live cells of WT mice (black bars) and  
1008 *Ccl28*<sup>-/-</sup> mice (white bars). Each circle represents a mouse. Bars represent the geometric mean ± SD.

1009

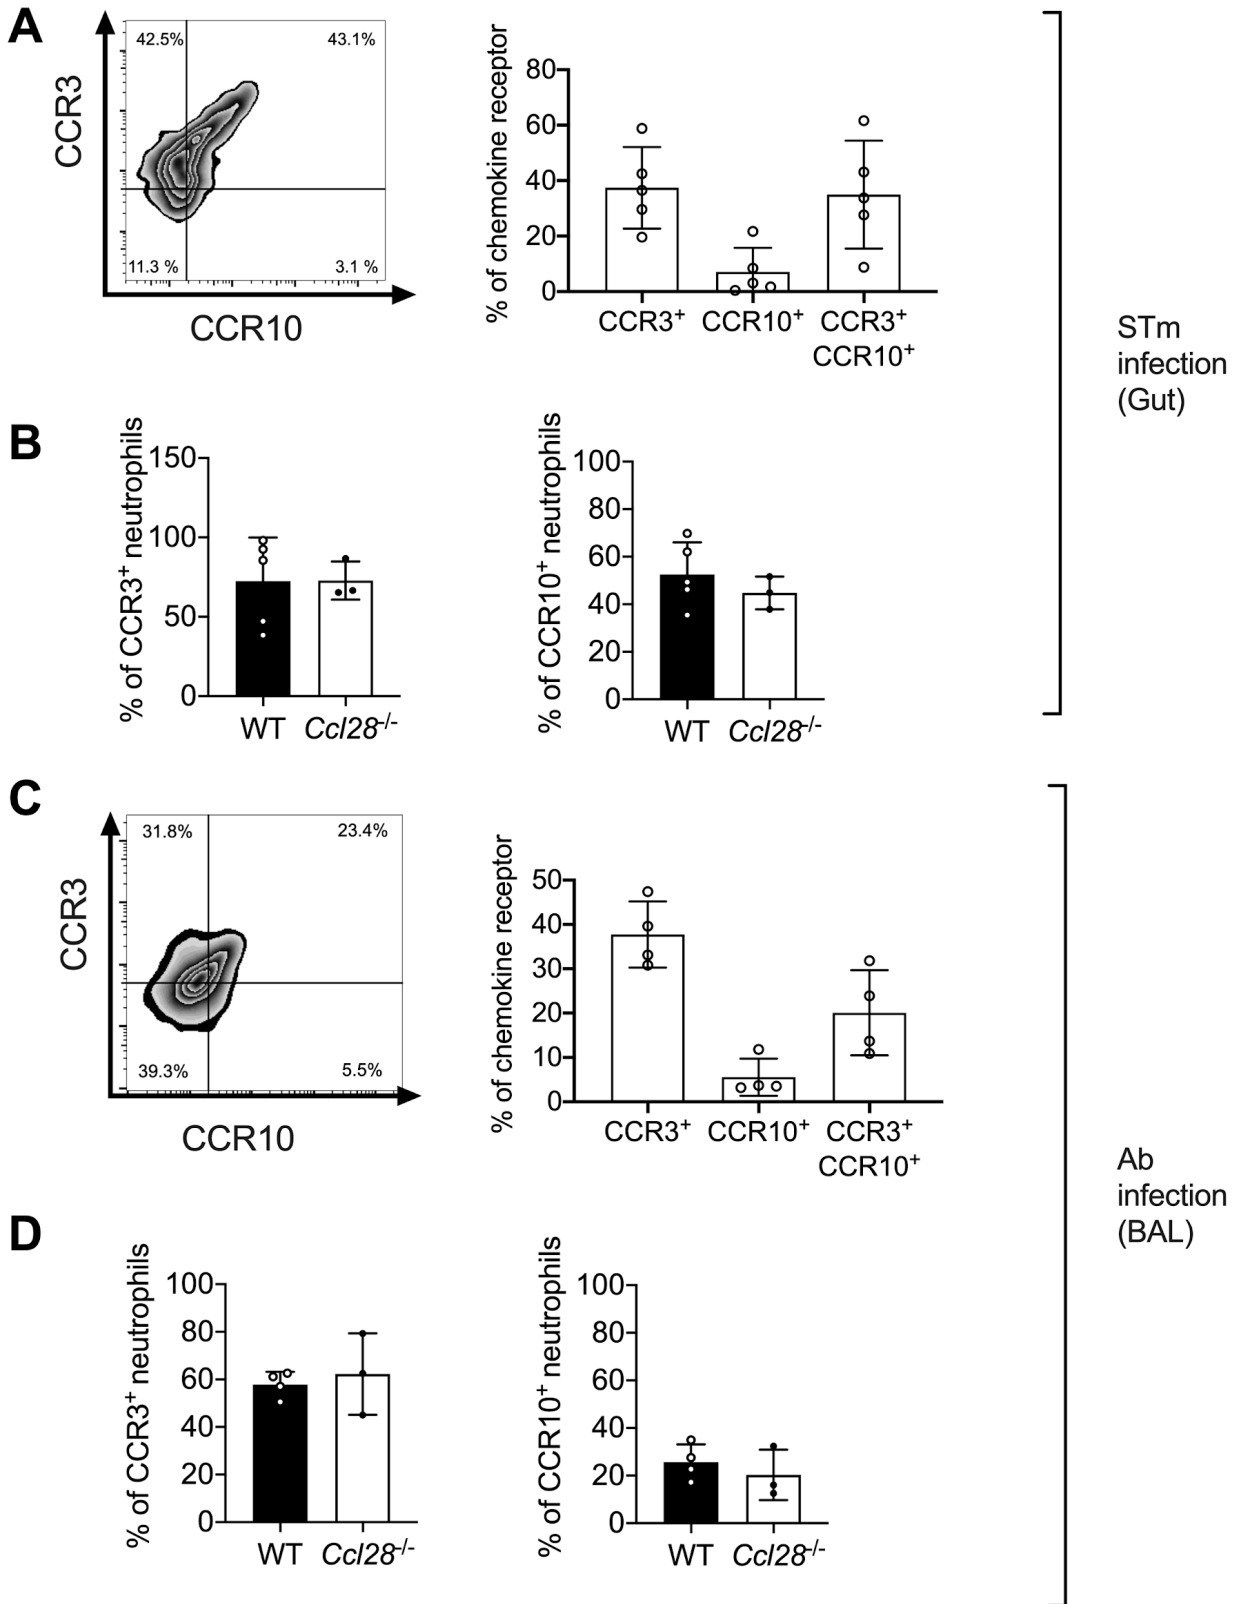

1011 **Supplementary Figure 3. Expression of CCR3 and CCR10 in neutrophils isolated from the**  
1012 **gut and lung mucosa.**

1013 **(A)** Surface expression of CCR3 and CCR10 on neutrophils obtained from the gut of WT mice  
1014 (n=5) infected with STm for 72h, analyzed by flow cytometry. **(B)** Percentage of CCR3<sup>+</sup> and  
1015 CCR10<sup>+</sup> neutrophils obtained from the gut of WT (n=5) and *Ccl28*<sup>-/-</sup> mice (n=3) infected with STm  
1016 for 72h, analyzed by flow cytometry. **(C)** Surface expression of CCR3 and CCR10 on neutrophils  
1017 obtained from the BAL of WT mice (n=4) infected with Ab for 24h, analyzed by flow cytometry.  
1018 **(D)** Percentage of CCR3<sup>+</sup> and CCR10<sup>+</sup> neutrophils obtained from the BAL of WT (n=4) and *Ccl28*  
1019 <sup>-/-</sup> mice (n=3) infected with Ab for 24h, analyzed by flow cytometry. **(A, C)** Left panels show  
1020 representative contour plots, and right panels show the percentages of neutrophils expressing  
1021 the indicated receptor on their surface. Bars represent the mean  $\pm$  SD.

1022

1023

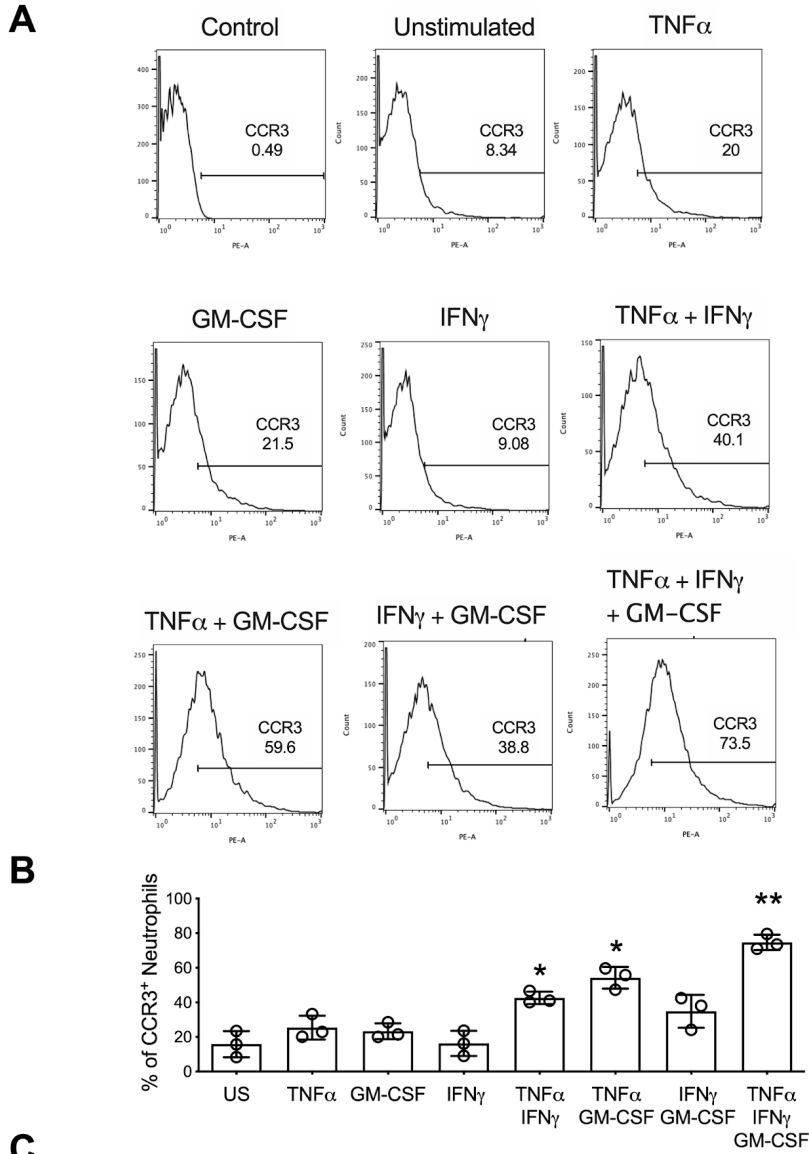

Supp. Fig. 4

1024

1025

1026 **Supplementary Figure 4. CCR3 surface expression is enhanced in bone marrow**  
1027 **neutrophils stimulated with a cytokine cocktail.**

1028 Bone marrow neutrophils were incubated with the indicated cytokines for 4h, and surface  
1029 expression of CCR3 was evaluated by flow cytometry. **(A)** Representative histograms and **(B)**  
1030 percentage of CCR3<sup>+</sup> neutrophils. Bars represent the mean ± SD. Data shown are representative  
1031 of two independent experiments, and statistical analysis was performed by a paired *t* test.  
1032 Significant changes are indicated by \**p* ≤ 0.05, \*\**p* ≤ 0.01. **(C)** Bone marrow neutrophils were  
1033 infected with opsonized STm at MOI=10 for 1h. Surface (left panels) or intracellular (right panels)  
1034 CCR10 was detected by flow cytometry. Surface CCR10 is also shown in **Fig. 2H** and displayed  
1035 here for comparison.  
1036

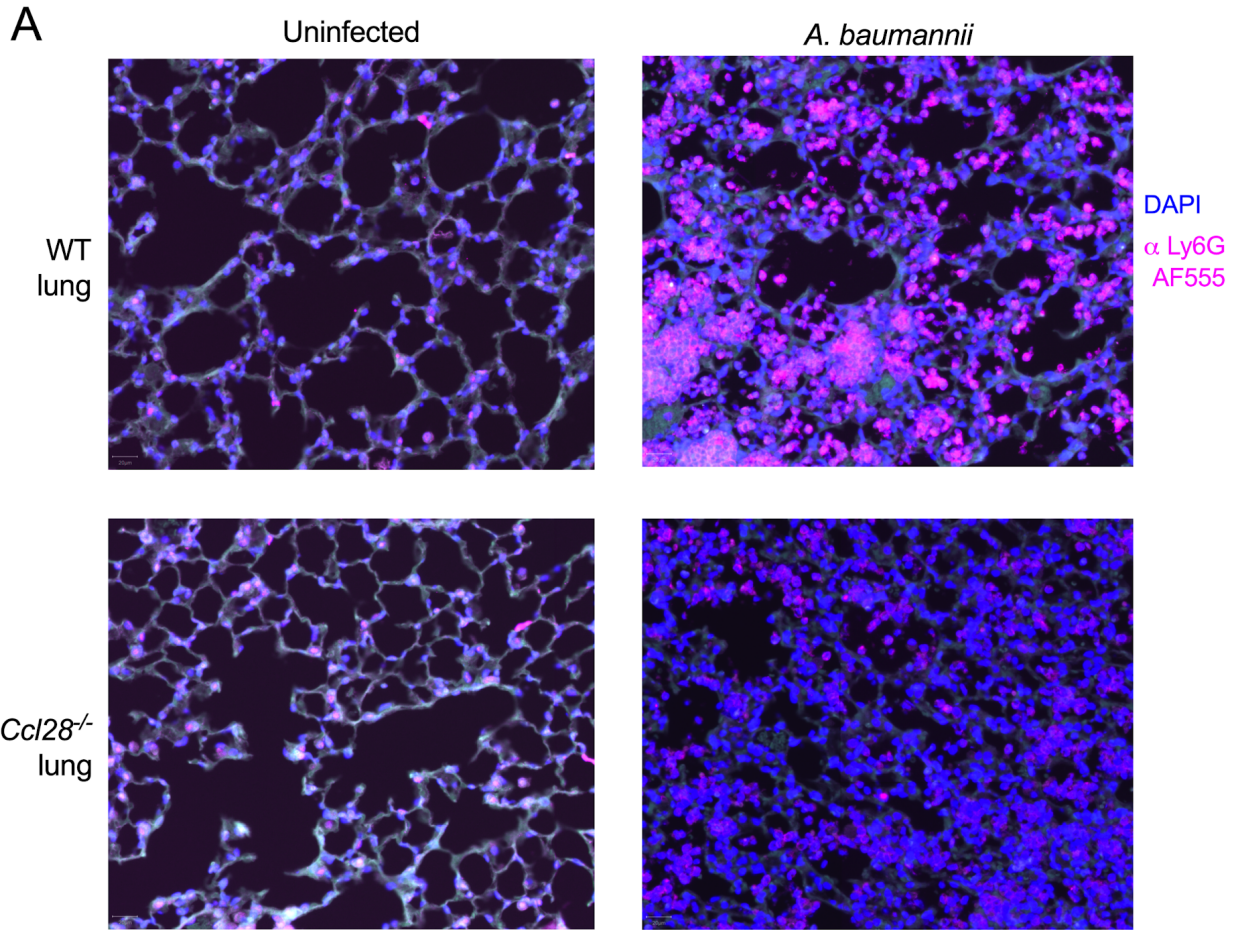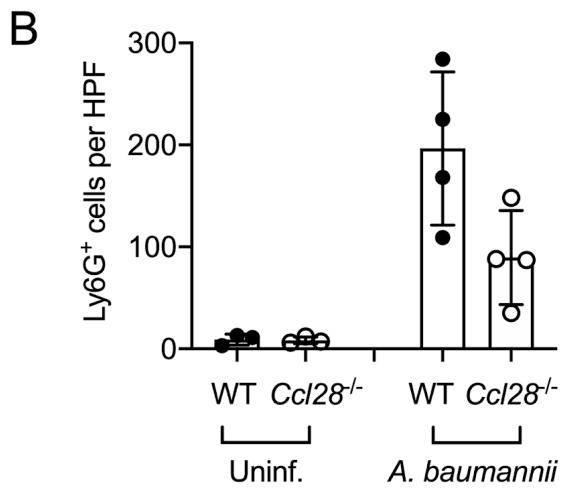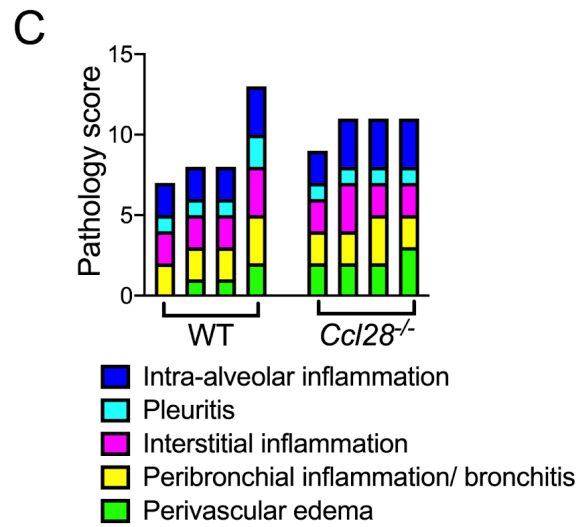



1038 **Supplementary Figure 5. Immunofluorescence staining and histopathology of**  
1039 ***Acinetobacter*-infected lungs from WT and *Ccl28*<sup>-/-</sup> mice.**

1040 **(A)** Representative immunofluorescence image of lungs from WT and *Ccl28*<sup>-/-</sup> mice, uninfected or  
1041 infected with *A. baumannii* (Ab) stained for the neutrophil marker Ly6G (magenta). DAPI (blue)  
1042 was used to label nuclei. **(B)** Quantification of Ly6G<sup>+</sup> cells in lungs from WT and *Ccl28*<sup>-/-</sup> mice,  
1043 uninfected or infected with Ab. Bars represent the mean ± SD, and each circle represents an  
1044 individual mouse. **(C)** Histopathological analysis of lungs from WT and *Ccl28*<sup>-/-</sup> mice infected with  
1045 Ab at 24 h post-infection. Each bar represents an individual mouse

1046

1047

1048

1049

1050

1051

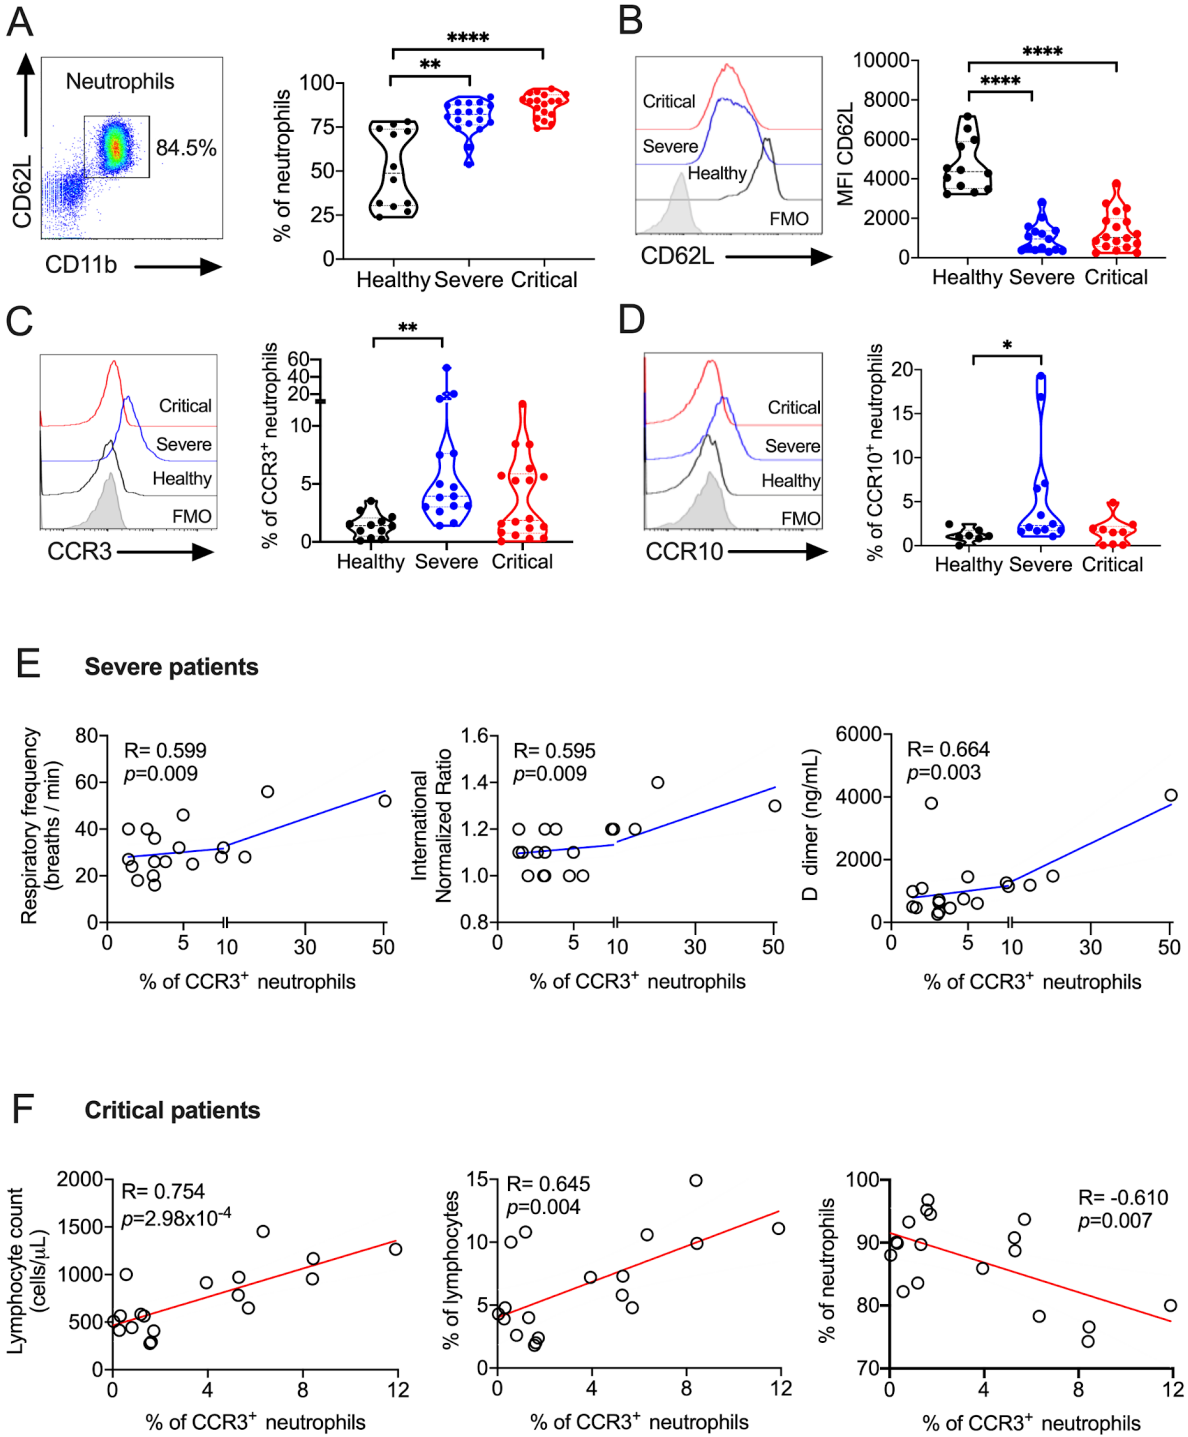

Supp. Fig. 6

1052

1053

1054 **Supplementary Figure 6. CCR3 and CCR10 are expressed on the surface of neutrophils**  
1055 **isolated from COVID-19 patients, and correlate with disease severity.** Blood samples were  
1056 obtained from healthy donors and COVID-19 patients, then processed to analyze neutrophils by  
1057 flow cytometry. **(A)** Left panel shows a representative dot-plot of neutrophils (gated on live, CD45<sup>+</sup>  
1058 CD11b<sup>+</sup> CD62L<sup>+</sup> cells) isolated from the blood, and right panel shows the percentage of  
1059 neutrophils in the blood of healthy donors and COVID-19 patients classified as severe or critical.  
1060 **(B-D)** Left panels show representative histograms of **(B)** CD62L, **(C)** CCR3, or **(D)** CCR10  
1061 expression on the surface of blood neutrophils from healthy donors, or severe or critical COVID-  
1062 19 patients. Right panels show **(B)** Median Fluorescence Intensity (MFI) of CD62L, **(C)**  
1063 percentage of surface CCR3<sup>+</sup> neutrophils or **(D)** percentage of surface CCR10<sup>+</sup> neutrophils in  
1064 blood from healthy donors, or severe or critical COVID-19 patients. **(A-D)** Bars represent the  
1065 mean  $\pm$  SE. Data was analyzed by one-way ANOVA. Significant changes are indicated by \* $p \leq$   
1066 0.05, \*\* $p \leq 0.01$ , \*\*\*\* $p \leq 0.0001$ . **(E, F)** Pearson correlation between the percentage of CCR3<sup>+</sup>  
1067 neutrophils and clinical parameters of patients with severe or critical COVID-19. Representative  
1068 correlation plots between the percentage of CCR3<sup>+</sup> neutrophils and selected clinical parameters  
1069 with statistically significant  $p$  values in **(E)** severe and **(F)** critical COVID-19 patients. R coefficients  
1070 (95% confidence interval) and  $p$  values are shown.
